1 **Title**

2

3 **Nanoscopical analysis reveals an orderly arrangement of the presynaptic**  
4 **scaffold protein Bassoon at the Golgi-apparatus**

5

6 **Authors**

7

8 Tina Ghelani<sup>1,6</sup>, Carolina Montenegro<sup>2,3,4</sup>, Anna Fejtova<sup>2,5</sup> and Thomas Dresbach<sup>1\*</sup>

9

10 1. Institute of Anatomy and Embryology, University Medical Center Göttingen,  
11 Kreuzberggring 36, 37075 Goettingen, Germany

12 2. Department of Neurochemistry and Molecular Biology, Leibniz Institute for  
13 Neurobiology, Magdeburg, Germany

14 3. Center of Behavioral Brain Sciences, Magdeburg, Germany

15 4. Institute for Pharmacology and Toxicology, Medical Faculty, Otto von Guericke  
16 University, Magdeburg, Germany

17 5. Department of Psychiatry and Psychotherapy, University Hospital Erlangen,  
18 Friedrich-Alexander Universität Erlangen-Nürnberg, Erlangen, Germany

19 6. Present address: Department of Biology / Chemistry / Pharmacy, Free University  
20 of Berlin, Takustr. 6, D-14195 Berlin

21

22 **\* Correspondence:**

23 Thomas Dresbach

24 [thomas.dresbach@med.uni-goettingen.de](mailto:thomas.dresbach@med.uni-goettingen.de)

25

26

27 **Abstract**

28

29 Bassoon is a core scaffold protein of the presynaptic active zone. In brain synapses,  
30 the C-terminus of Bassoon is oriented toward the plasma membrane and its N-  
31 terminus is oriented towards synaptic vesicles. At the Golgi-apparatus Bassoon is  
32 thought to assemble active zone precursor structures, but whether it is arranged in an  
33 orderly fashion is unknown. Understanding the topology of this large scaffold protein  
34 is important for models of active zone biogenesis.

35

36 Using stimulated emission depletion nanoscopy in cultured hippocampal neurons, we  
37 found that an N-terminal intramolecular tag of recombinant Bassoon, but not C-terminal  
38 tag, colocalized with markers of the trans-Golgi network. The N-terminus of Bassoon  
39 was located between 48 nm and 69 nm away from TGN38, while its C-terminus was  
40 located between 100 nm and 115 nm away from TGN38. Sequences within the first 95  
41 amino acids of Bassoon were required for this arrangement.

42

43 Our data are consistent with a model, in which the N-terminus of Bassoon binds to the  
44 membranes of the trans-Golgi network, while the C-terminus associates with active  
45 zone components, thus reflecting the topographic arrangement characteristic of  
46 synapses also at the Golgi-apparatus.

## 47 Introduction

48 Scaffold proteins recruit and anchor molecules to subcellular sites. Due to their multi-  
49 domain, modular structure, they bind and regulate multiple proteins to coordinate  
50 biochemical reactions in space and time. Employing scaffold proteins is a fundamental  
51 principle of cell function, operating during protein folding, receptor and signaling  
52 molecule clustering, and at cell-cell-junctions (Good et al., 2011).

53 Synapses are asymmetric cell-cell junctions assembled and regulated by  
54 scaffold molecules. On the presynaptic side, a set of synaptic scaffold proteins  
55 confines the docking of synaptic vesicles and the exocytotic release of  
56 neurotransmitter from these vesicles to specialized sites of the axonal plasma  
57 membrane, called active zones. Several families of scaffold proteins operate at active  
58 zones, including RIMs, RIM binding proteins, Munc13s,  $\alpha$ -liprins and ELKS/CAST/ERC  
59 proteins, as well as the particularly large scaffold proteins Bassoon and Piccolo  
60 (Südhof, 2012; Gundelfinger et al., 2016). One way by which the presynaptic  
61 machinery acts is through RIMs, which recruit both voltage gated calcium channels  
62 and Munc13s, a family of proteins essential for making synaptic vesicles tethered at  
63 the active zone fusion competent (Südhof, 2012; Imig et al., 2014; Acuna et al., 2016).  
64 Bassoon regulates this core transmitter release machinery, at least at some synapses,  
65 by selectively recruiting the P/Q type of voltage gated calcium channels and by  
66 speeding up synaptic vesicle reloading to release sites during ongoing activity  
67 (Davydova et al., 2014; Hallermann et al., 2010; Mendoza-Schulz et al., 2014). In  
68 addition to regulating transmitter release, Bassoon and Piccolo maintain synaptic  
69 integrity by reducing the proteasome- and autophagy-mediated degradation of  
70 presynaptic molecules (Waites et al., 2013; Okerlund et al., 2017; Hoffmann-Conaway  
71 et al., 2020; Montenegro-Venegas et al., 2021). At the electron microscopy level, the  
72 multimolecular complex of presynaptic scaffold proteins manifests as a meshwork of  
73 filamentous structures termed the presynaptic particle web (Philips et al., 2001) or  
74 cytomatrix of active zones, i.e., CAZ (Cases-Langhoff et al., 1996; Garner et al., 2000;  
75 Dresbach et al., 2001).

76 Bassoon is a particularly large CAZ molecule, comprising 3938 amino acids in  
77 the rat, and 3926 amino acids in humans (tom Dieck et al., 1998). It shares 10 regions  
78 of sequence homology with Piccolo/Aczonin (Fenster et al., 2000; Wang et al., 1999).  
79 Light microscopy super-resolution studies and electron microscopy studies have  
80 revealed that Bassoon and Piccolo are oriented in a particular way at synapses, with  
81 their C-termini closer to the active zone plasma membrane than their N-termini (Dani  
82 et al., 2010; Limbach et al., 2011). Thus, Bassoon and Piccolo appear to be extended  
83 proteins with a parallel orientation at synapses, consistent with the assumption that  
84 they may represent some of the filamentous CAZ structures observed by electron  
85 microscopy.

86 Using recombinant Bassoon constructs (Dresbach et al., 2003) we previously  
87 imaged the incorporation of Bassoon into nascent synapses and its turnover at existing  
88 synapses (Shapira et al., 2003; Bresler et al., 2004; Tsurriel et al., 2006; Tsurriel et al.,  
89 2009). In the course of these studies, we also found that Bassoon – in addition to being  
90 a CAZ protein – is associated with the Golgi-apparatus, and that associating with the  
91 Golgi-apparatus is a prerequisite for the subsequent trafficking of Bassoon to synapses  
92 (Dresbach et al., 2006). Indeed, Bassoon, Piccolo and ELKS/CAST/ERC are all  
93 detected at the Golgi apparatus, and appear to exit the Golgi apparatus on transport  
94 vesicles that may carry CAZ material to synapses (Zhai et al., 2001; Maas et al. 2012).  
95 Unlike at synapses, the nanostructure of Bassoon at its second prominent subcellular  
96 localization, i.e., the Golgi-apparatus, has not been investigated. Here, we created a  
97 new generation of Bassoon constructs and determined their localization and

98 arrangement at the Golgi-apparatus by stimulated emission depletion (STED)  
99 microscopy. We find that Bassoon is an extended molecule at the trans-Golgi-network  
100 (TGN) with its N-terminus closer to the TGN than its C-terminus.

## 101 **Results**

### 102 **Characterizing second generation full-length Bassoon constructs**

103 We first aimed at improving three features of recombinant Bassoon:

104 a) Faithful expression of the full-length protein including its C-terminal tag: when  
105 expressed in neurons, Bassoon-1-3938-EGFP, in addition to producing punctate  
106 synaptic fluorescence signals, also produces diffusely distributed green fluorescence,  
107 presumably resulting from soluble EGFP or a soluble C-terminal fragment of Bassoon  
108 with the EGFP-tag attached (Dresbach et al., 2003). We realized serendipitously that  
109 this diffusely distributed green fluorescence also occurred when the EGFP coding  
110 sequence was attached out of frame to the 3' end of Bassoon, suggesting that a cryptic  
111 ribosomal entry site exists somewhere near the 3'-region of Bassoon or in the linker  
112 located between Bassoon and EGFP. To prevent translation of the C-terminal EGFP-  
113 tag we changed the linker sequence and removed the start ATG from the EGFP coding  
114 sequence.

115 b) The accessibility of its N-terminus: Bassoon contains a functional consensus  
116 site for N-myristoylation (Dresbach et al., 2003), so N-terminal tags might impair N-  
117 myristoylation. Ideally, a tag designed to locate the N-terminal region of Bassoon  
118 should be placed downstream of the N-myristoylation consensus site. To leave this  
119 consensus site unaffected, we placed either RFP, CFP or GFP as an intramolecular  
120 tag 97 amino acids downstream of the N-terminus of Bassoon, using an endogenous  
121 HindIII site in the rat Bassoon cDNA. We will refer to these tags as "intramolecular N-  
122 terminal" tags, to highlight both of their features, i.e., leaving the very N-terminus intact,  
123 and placed close to it.

124 c) Its tendency to aggregate: Bassoon may form homodimers, and heterodimers  
125 with Piccolo (Maas et al., 2012). Tags with an inherent capacity to dimerize could cause  
126 aberrant oligomerization and generate non-functional aggregates of Bassoon. To  
127 prevent this, we used monomeric fluorescent proteins, including RFP, CFP and the  
128 A207K variant of EGFP. We use the term "EGFP" when referring to previously  
129 generated constructs, which harbor standard EGFP, and we use the term "GFP" when  
130 referring to new constructs, which harbor the monomeric variant. A schematic synopsis  
131 of these new constructs is presented in Figure 1A.

132 To test the new constructs, we transfected dissociated rat hippocampal cultures with  
133 the new full-length single-tagged and double-tagged Bassoon constructs on day 3 after  
134 plating (day in vitro 3; DIV 3). We characterized the subcellular localization of these  
135 Bassoon constructs in young (DIV5) and mature (>DIV13) neurons (Fig 1.), by  
136 immunostaining fixed cultures using a single-domain antibody (nanobody) directed  
137 against RFP, a polyclonal antisera directed against GFP, and monoclonal or polyclonal  
138 antibodies directed against markers for subcellular structures. The extended  
139 characterization of all single-tagged second-generation Bassoon constructs can be  
140 found in supplementary Figure 1.

141 In the soma of young neurons, all constructs were readily detected at the Golgi  
142 apparatus, labeled by the trans-Golgi-network (TGN) transmembrane protein TGN38  
143 (Figure 1B—E). Previous reports observed similar localizations of endogenous and

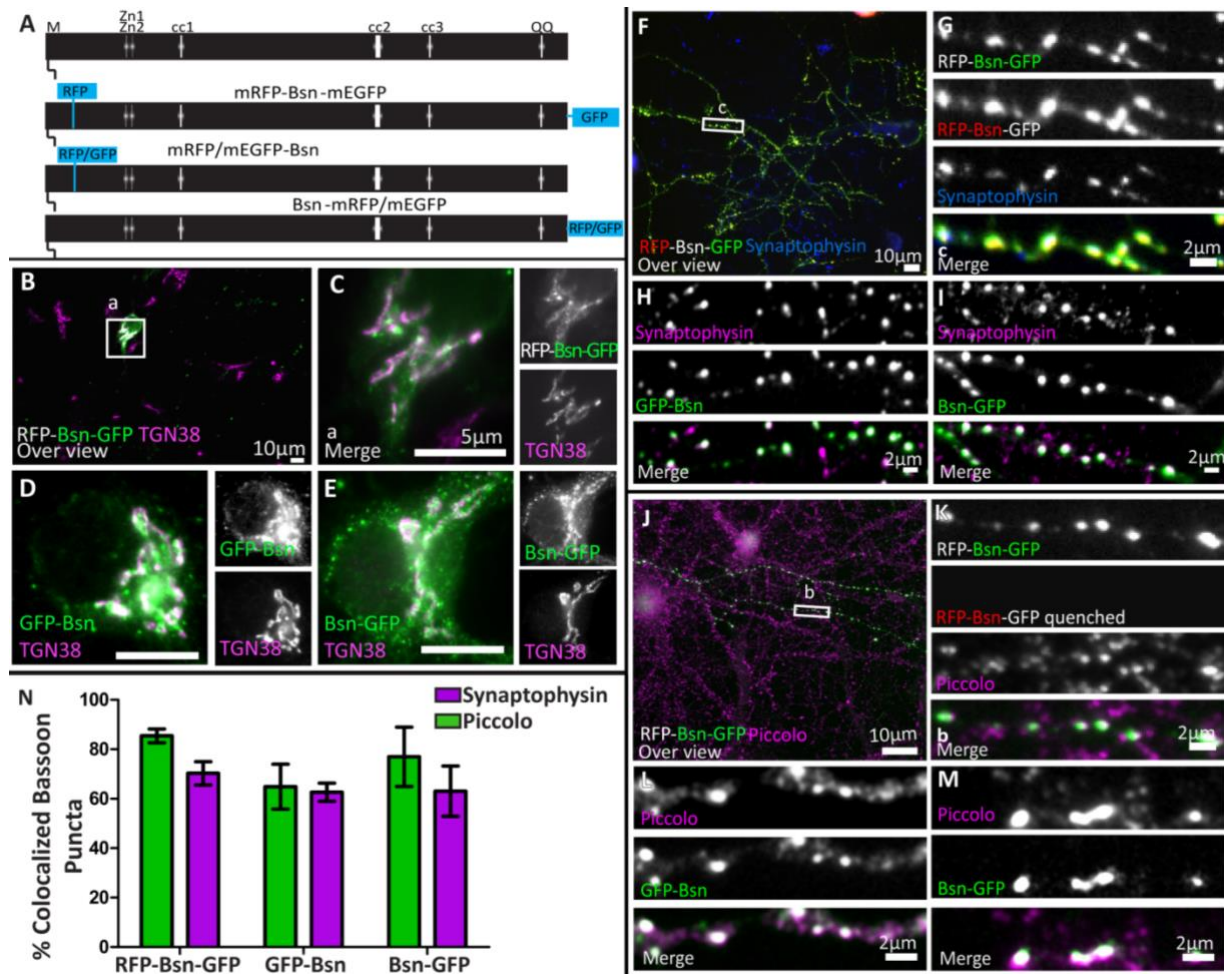

144  
 145 **Figure 1. Full-length Bassoon constructs localize at the TGN in young neurons, traffick to synaptic sites, and are**  
 146 **incorporated into the insoluble AZ scaffold of mature neurons.** Panel A is a schematic diagram of full-length Bassoon  
 147 sequence compared to the sequence of full-length double- and single-tagged (either mRFP / mEGFP tagged)  
 148 Bassoon constructs where M stands for N-myristoylation sequence, Zn1 and Zn2 are the two zinc finger domains and cc1, cc2, cc3,  
 149 are the three predicted coiled-coil regions. Immunostained DIV7 (B–E) and DIV14 (F–M) hippocampal neurons transfected with  
 150 full-length double- and single-tagged Bassoon constructs with GFP, post a DIV3 lipofectamine transfection, are co-stained with  
 151 the TGN38 (B–E), synaptophysin (F–I) and Piccolo (J–M) markers. Panels B, F, and J represent 40X over views of the  
 152 transfections and C, G and K represent the zooms of their white square ROIs, respectively. Neurons in panels B, C, J and K  
 153 were briefly fixed in cold methanol prior to normal fixation, to quench the RFP and GFP autofluorescence. Panels J–K are  
 154 stained with TGN38 (purple) and a GFP antibody (green). Panels J–M are immuno-labeled for GFP antibody (green) and  
 155 Piccolo (purple) after a 90 second treatment of 0.1% Triton X-100 and five minute methanol wash. N is the colocalization  
 156 quantification of anti GFP immunofluorescence of Bassoon for panels F–M; data are represented as mean  $\pm$  SD, N=5 cells from  
 157 two separate experiments for each quantification. Scale bars 10  $\mu$  m (B, F, and J), 5  $\mu$  m (C–E) and 2  $\mu$  m (G–I and K–M).

158 recombinant Bassoon signals in young neurons (Dresbach et al., 2006; Maas et al.,  
 159 2012). To test the targeting of these constructs to synapses and their incorporation into  
 160 the CAZ matrix, we analyzed their localization in mature neuronal cultures. In DIV14  
 161 neurons immunostained for the tags and the synaptic vesicle marker synaptophysin or  
 162 the CAZ marker Piccolo, none of the constructs showed the diffusely distributed green  
 163 fluorescence associated with the first-generation Bassoon-EGFP (Dresbach et al.,  
 164 2003), and all of the constructs accumulated at synaptic sites (Fig. 1F–N). The degree  
 165 of colocalization with synaptophysin was 70.25% ( $\pm$  18.23% SD) for the dually tagged  
 166 construct, 66.7% ( $\pm$  12.9% SD) for mRFP Bassoon, and 62.64% ( $\pm$  6.37% SD) for Bsn-  
 167 mRFP (Figure 1F–I, N and supplementary Figure 1). Likewise, these Bassoon  
 168 accumulations colocalized with the core CAZ scaffold protein Piccolo (Figure 1J–N  
 169 and supplementary Figure 1), further corroborating their localization to synapses. This  
 170 was true for the dually tagged (85.4%  $\pm$  18.42% SD) and the single-tagged Bassoon  
 171 constructs (69%  $\pm$  5.6% SD for mRFP-Bsn and 76.97%  $\pm$  10.16% SD Bsn-mRFP).

172 Active zone proteins become resistant to Triton X-100 extraction once they became  
173 incorporated into the CAZ scaffold (Dresbach et al., 2003). When we applied a  
174 0.1% Triton X-100 extraction to live neurons, followed by fixation and immunostaining  
175 for the tags and for endogenous Piccolo, we found that the synaptic accumulations of  
176 the recombinant proteins were indeed preserved. Colocalization with Piccolo was  
177 85.43% ( $\pm$  18.42% SD) for the dually tagged Bassoon, 64.85% ( $\pm$  15.74% SD) for GFP-  
178 Bsn, and 76.97% ( $\pm$  24.01% SD) for Bsn-GFP). The resistance of the recombinant  
179 Bassoon to the Triton X-100 treatment is indicative of their successful incorporation  
180 into mature active zone scaffolds (Figure 1 J—N).

### 181 **Visualizing the orientation of full-length Bassoon constructs with nanobodies** 182 **and super-resolution imaging**

183 We then employed these constructs to study recombinant Bassoon by STED  
184 nanoscopy. To take full advantage of super-resolution microscopy, we used camelid  
185 antibodies, called nanobodies, to detect the tags. These anti-mRFP and anti-mEGFP  
186 nanobodies are small (1.5 nm x 2.5 nm) single-domain molecules derived from one  
187 heavy chain of an alpaca IgG antibody (Hamers-Casterman et al., 1993). They are  
188 designed to identify a single epitope on the tertiary structure of mRFP and mEGFP  
189 fluorophores (5nm diameters). These nanobodies were pre-coupled to two molecules  
190 of organic ATTO-TEC dyes, each 2—3nm in size. The mRFP nanobody was coupled  
191 to ATTO594, the mEGFP nanobody was coupled to ATTO647. Compared to traditional  
192 primary and secondary antibodies, which create a 30 nm labeling distance from the  
193 epitope site, the nanobody-ATTO dye complex generates a three times smaller label  
194 cloud around the tags (Wildanger et al., 2009).

195 Our microscopy setup allowed us to record triple-immunofluorescence images,  
196 with two dyes recorded in STED mode at a resolution of 20 nm, and a third dye  
197 recorded in confocal mode. In the first set of experiments, we analyzed cultures  
198 transfected with dually tagged Bassoon, asking three questions: 1) Do the nanobodies  
199 allow for detection of the construct in STED mode? 2) Can we spatially resolve the N-  
200 and the C-terminus of the dually tagged construct? 3) If so, is the recombinant  
201 construct oriented as predicted, i.e., with the C-terminus closer to the active zone than  
202 the N-terminus (Dani et al., 2010)?

203 Both the RFP-nanobody and the GFP-nanobody produced line-shaped or  
204 crescent-shaped signals (Fig. 2A-D), as expected for the appearance of active zone  
205 associated proteins at super-resolution (Dani et al., 2010). To make sure that what we  
206 analyzed represented synaptic Bassoon, we only analyzed signals fulfilling two criteria:  
207 they had to be line-shaped or crescent-shaped, suggesting that they represent side-  
208 view synapses, and, in addition, they had to colocalize with postsynaptic marker  
209 PSD95 immunofluorescence recorded in the confocal mode, corroborating that these  
210 signals represent synaptic Bassoon (Fig. 2A-D). Comparing the nanobody-signals to  
211 signals produced by a conventional monoclonal antibody directed against amino acids  
212 756-1001 of Bassoon and detected by secondary antibodies revealed that the  
213 nanobody signals and the indirect immunofluorescence signals colocalized when  
214 analyzed by dual color STED microscopy. In addition, the nanobody signals produced  
215 sub-clusters of fluorescence within the lines and crescents (Fig. 2A-D). This is  
216 consistent with the assumption that their small size and their direct coupling to the  
217 fluorescent dyes allows for greater detection precision compared to indirect  
218 immunofluorescence with a conventional antibody. Overall, these data indicate that the  
219 RFP- and GFP-nanobodies can localize the N- and C-terminus of recombinant  
220 Bassoon molecules within the CAZ of mature neurons, and that the spatial precision

221 of detection at least equals, and may exceed, the spatial precision provided by indirect  
 222 immunofluorescence using a conventional antibody.  
 223

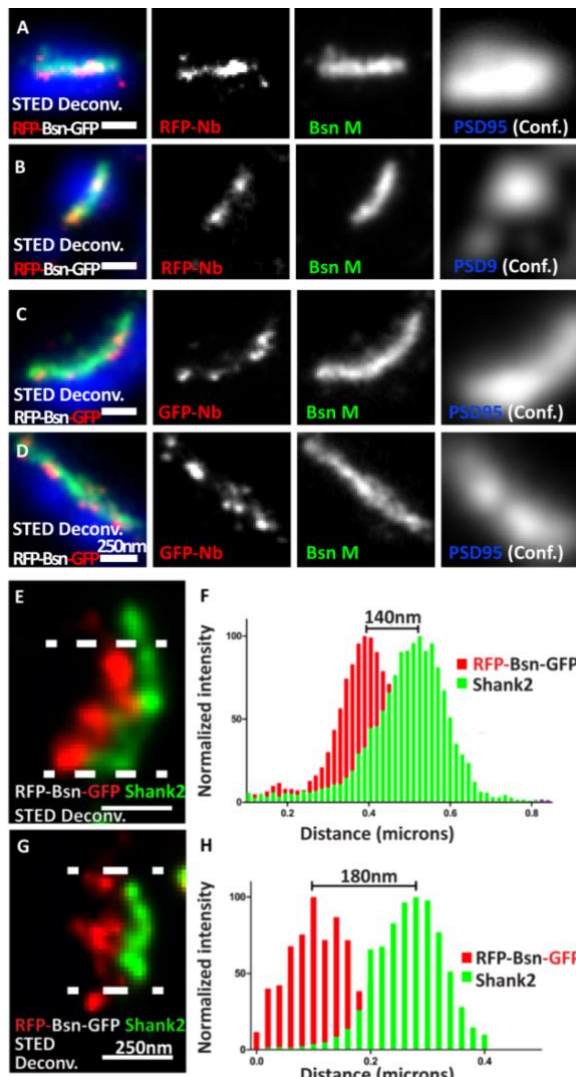

**Figure 2. Visualizing the termini of full-length mRFP-Bassoon-mEGFP construct and its orientation with nanobodies, at mature synaptic sites.** DIV21 mass hippocampal cultures transfected with the mRFP-Bassoon-mEGFP construct and imaged using two-color STED microscopy. The construct was visualized at synaptic sites with postsynaptic scaffold markers PSD95 and Shank2, using either the RFP-nanobody-Atto594 to visualize the RFP tag and the N-terminus of the Bassoon construct (A, B, and G) / the GFP-nanobody-Atto594 to visualize the GFP tag and the C-terminus of the Bassoon construct (C—E). Panels A—D are two-color-STED deconvolved (Deconv.) images of triple color stainings that label the endogenous presynaptic Bassoon signals with a traditional monoclonal antibody, nanoclusters of nanobody signals within the endogenous presynaptic Bassoon signals, and postsynaptic scaffold marker PSD95 (in confocal mode). Panels E and G show the localization of nanobody labelled C- and N-termini of mRFP-Bassoon-mEGFP and Shank2 in side-view images of its synapses. Distribution of localization points within a 350nm thick line profiles at the center of the synapse (as shown by the area within the dashed lines) were measured, fit with gaussian distributions and are plotted in panels F (C-terminus of tagged Bassoon and Shank2) and H (N-terminus of tagged Bassoon and Shank2). The distance between centroids of the two Gaussians defines the Bassoon-Shank2 distances. Scale bars 250nm (A—G).

224

225

226 The orientation of endogenous Bassoon at synapses in brain sections was previously  
 227 analyzed using conventional antibodies imaged by Stochastic Optical Reconstruction  
 228 Microscopy (STORM) (Dani et al., 2010, Held et al., 2020). These studies used the  
 229 monoclonal antibody to detect amino acids 756-1001 and/or a polyclonal antibody  
 230 against the C-terminal 330 amino acids of Bassoon. They showed that Bassoon  
 231 molecules possess an extended conformation within the CAZ scaffold and are oriented  
 232 with their C-termini closer to the synaptic cleft than their N-termini. Using our dual color  
 233 STED setup, we tested whether our constructs adopt a similar orientation in cultured  
 234 neurons. We found that they indeed possess a similarly extended conformation, with  
 235 the C-terminus 140 nm and the N-terminus 180 nm from the postsynaptic scaffold  
 236 marker Shank2 (Fig. 2E-H). These constructs, in combination with nanobodies and  
 237 STED microscopy, therefore, form an effective toolbox to visualize the nanoscopic  
 238 localization and orientation of recombinant Bassoon in neurons.  
 239

### 240 **Visualizing the orientation of new full-length Bassoon constructs at the Golgi-** 241 **apparatus**

242 How Bassoon is arranged at subcellular sites other than synapses has not been  
 243 investigated by nanoscopy thus far. Bassoon may form primordial scaffolds at the  
 244 level of the Golgi-apparatus (Dresbach et al., 2006; Maas et al., 2012). To arrive at a

245 more comprehensive understanding of the possible arrangement of Bassoon, we  
246 used STED microscopy to determine the localization and orientation of our new  
247 constructs at the Golgi-apparatus of immature neurons, at DIV7.

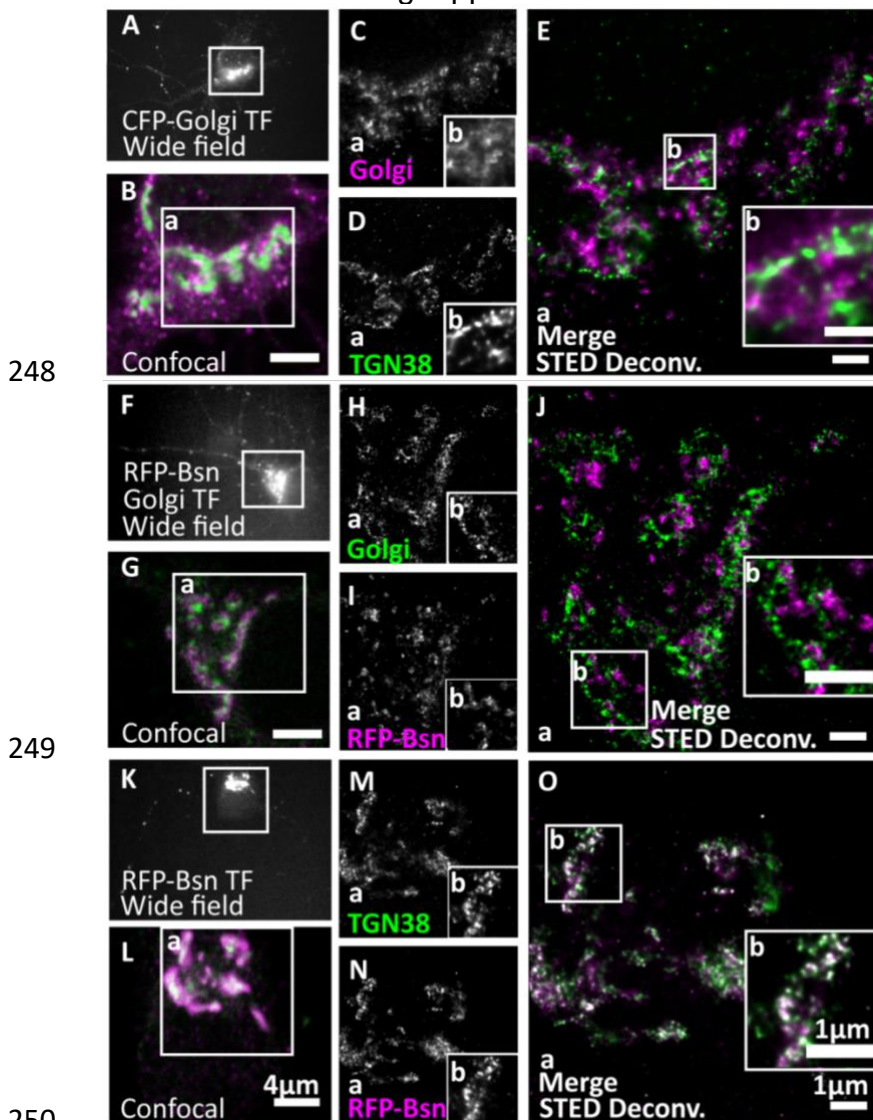

248

249

250

251

252

253

254

255

256

257

258

259

260

261

262

263

264

265

266

267

268

**Figure 3. Full-length Bassoon localizes to the trans-Golgi network, not the trans-Golgi sub-compartment.**

DIV7 hippocampal neurons were transfected with CFP-Golgi (*trans*-Golgi sub-compartment marker), full-length single-tagged mRFP-Bsn construct, and immunostained using GFP and/or RFP nanobodies against tagged constructs and from A–E with TGN38 (*trans*-Golgi network maker). Two-color STED images of both Golgi sub-compartment markers (A–E), CFP-Golgi and RFP-Bsn constructs (F–J), and RFP-Bsn at TGN38 (a *trans*-Golgi Network maker) (K–O). A, F, K show wide field overview of transfected construct, B, G, L the confocal zooms of the soma, insets a reflect the single channels and merged full STED deconvolved (Deconv.) images of C–E, H–J, and M–O, while insets b represents the zooms of STED images. Scale bars 4 $\mu$ m (B, G and L) and 1 $\mu$ m (E, J and O).

We began by testing which Golgi compartment recombinant Bassoon is located to. The Golgi compartment is polarized across the flat stacks of cisternae/lamellae that form sub-compartments at its *cis* side, which receives materials from the endoplasmic reticulum (ER), and the Trans Golgi (TG) side, which sends them forward to their destinations. Additional vesicular-tubular structures both on the *cis* and *trans* ends of the Golgi stack, are known to form specialized compartments for cargo sorting at the entry and exit sides of the Golgi. The *trans*-Golgi network (TGN) is a post-Golgi compartment, following the TG sub-compartment that is involved in complex cargo sorting mechanisms (Griffiths and Simons, 1986; Mellman and Simons, 1992). We identified the TG sub-compartment and its neighboring compartment the TGN separately and compared the extent of co-localization of Bassoon at these two substructures in the soma of cultured neurons. To label the TG sub-compartment, we expressed a CFP-tagged construct (named CFP-Golgi) containing the cytoplasmic domain of  $\beta$ -1,4-galactosyltransferase-11, which labels the last Golgi cisterna of the *trans*-Golgi compartment (Wittenmayer, 2014). To label the TGN, we immunostained for the marker TGN38. We detected recombinant constructs using the nanobodies, and we detected TGN38 using conventional primary and secondary antibodies. STED imaging revealed that the signals for the TG sub-compartment and TGN can be



269 resolved and occupy different localizations in the soma (Fig. 3 A-E). mRFP-Bsn  
270 displayed virtually no colocalization with CFP-Golgi labeled TG lamellae (Fig. 3 F-J),  
271 but colocalized extensively with TGN38 (Fig.3 K-O), indicating that this construct is  
272 more closely associated with the TGN lamella than with the TG sub-compartment  
273 lamellae.

274 We then sought to determine the localization – and possibly the orientation – of  
275 Bassoon at the TGN in more detail. We first imaged the double-tagged Bassoon  
276 construct (RFP-Bsn-GFP) in somas of DIV7 neurons labeled with TGN38. The  
277 intramolecular N-terminal tag of the construct colocalized more extensively with  
278 TGN38 than its C-terminal tag (Fig. 4A-K). On average, 67.5% ( $\pm 12.5\%$  SD) of the  
279 signals coming from the intramolecular N-terminal tag, but only 29.8% ( $\pm 7.7\%$  SD) of  
280 the signals coming from the C-terminal tag colocalized with TGN38 (Figure 4T). To  
281 rule out that the difference could be caused by different avidities of the RFP- and the  
282 GFP- nanobodies we transfected neurons either with RFP-Bsn or with Bsn-RFP and  
283 detected the tags of both constructs using the RFP nanobody. Again, the  
284 intramolecular N-terminal tag colocalized more extensively with TGN38 than the C-  
285 terminal tag (Fig. 4L-S). In particular, the intramolecular N-terminal RFP showed 84.8%  
286 ( $\pm 4.6\%$  SD) colocalization while the C-terminally located RFP showed 44.4% ( $\pm 2.4\%$   
287 SD) colocalization (Fig. 4T). Thus, both the dually tagged and the single tagged  
288 constructs reveal a closer apposition of the N-terminal region of Bassoon with TGN38  
289 than its C-terminal region.

290 Next, we quantified the distribution pattern of tagged Bassoon termini at certain  
291 distances relative to the TGN. To this end, we defined two distance categories, i.e., 0-  
292 100 nm and 101nm—1 $\mu$ m from TGN38 signals. We excluded Bassoon signals farther  
293 than 1 $\mu$ m from TGN38 signals, assuming that these signals were not associated with  
294 the TGN. The intramolecular N-terminal tags of both double- and single-tagged  
295 Bassoon predominantly occupied the 0-100nm distance range. Fraction sizes were  
296  $0.67 \pm 0.1$  SD for RFP-Bsn-GFP and  $0.84 \pm 0.04$  SD for RFP-Bsn. A smaller fraction of  
297 each construct occupied the 101nm—1 $\mu$ m distance range. Here, fraction sizes were  
298  $0.33 \pm 0.1$  SD for RFP-Bsn-GFP and  $0.15 \pm 0.04$  SD RFP-Bsn (Fig. 4U). In contrast to  
299 the intramolecular N-terminal tags, the C-terminal tags of all constructs were more  
300 evenly distributed between the two categories, with a tendency towards localization in  
301 the 101nm-1 $\mu$ m range: a slightly larger fraction of RFP-Bsn-GFP ( $0.63 \pm 0.1$  SD) and  
302 Bsn-RFP ( $0.55 \pm 0.03$  SD) resided within 101nm—1 $\mu$ m, and the remaining smaller  
303 fraction of signals, for double- ( $0.37 \pm 0.1$  SD) and single-tagged ( $0.45 \pm 0.03$  SD)  
304 Bassoon constructs, were present within the 0-100nm distance range (Fig. 4U). Thus,  
305 all constructs were distributed in such a way that the intramolecular N-terminal tag had  
306 a greater likelihood for detection within 100nm of TGN38 than the C-terminal tag.  
307 Overall, both the percentage of colocalization and the distance distribution indicate an  
308 orientation of recombinant Bassoon at the TGN where the N-termini are arranged  
309 closer to the TGN than their C-termini.

310 Is this arrangement of Bassoon specific for the localization of Bassoon relative  
311 to one particular Golgi-protein, i.e., TGN38, or does it reflect the orientation of Bassoon  
312 relative to the TGN-compartment in general? To assess this, we imaged RFP-Bsn,  
313 Bsn-RFP and RFP-Bsn-EGFP in neurons immunostained for another TGN marker,  
314 i.e., Syntaxin6 (Syn6). As seen before with TGN38, the percentage of colocalization  
315 with Syn6 was higher for the intramolecular N-terminal tags of RFP-Bsn-EGFP (71.8%)  
316 and RFP-Bsn (75.8%) than for the C-terminal tags of RFP-Bsn-EGFP (23.8%) and

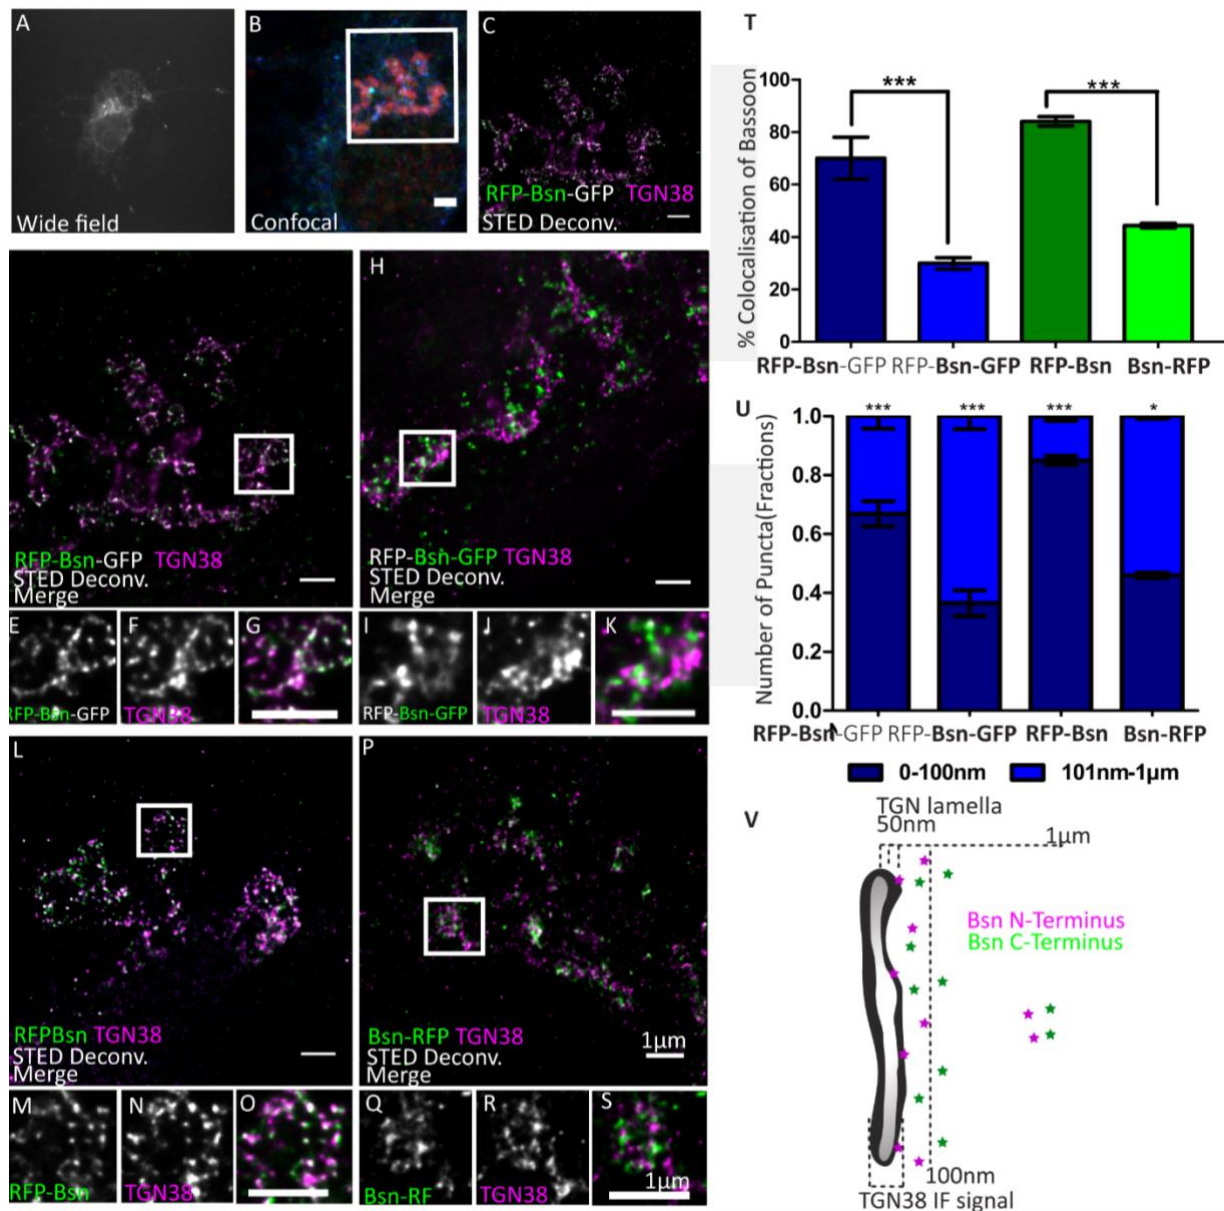

317  
 318  
 319 **Figure 4 Orientation double- and single-tagged Bassoon constructs at the *trans*-Golgi network marker TGN38.** DIV7  
 320 hippocampal neurons transfected with double-(A–K) and single-tagged (L–S) full-length Bassoon are immunostained with  
 321 the *trans*-Golgi network marker TGN38 and an RFP-nanobody-Atto594 to visualize the RFP tag (A–G, L–O and P–S) / a GFP-  
 322 nanobody-Atto594 to visualize the GFP tag (H–K). The experimental schematic (panels A–C) demonstrates the acquisition  
 323 of two-color STED images wherein the wide field over view of the transfected neuron (A), its corresponding confocal over  
 324 view of the soma, with GFP autofluorescence in blue, (B) and a 10µmX10µm inset scanned in STED mode to visualize the  
 325 constructs' N-terminus (C, D and L) and C-terminus (H and P). Merged and single channel views of the zoom images of E–  
 326 G, I–K, M–O, and Q–S are representations of the white ROIs in the STED images D, H, L and P respectively. T represents  
 327 the colocalization quantification, and U represents the allocation quantification at and away from TGN lamella i.e. 0–100nm  
 328 or 101nm–1µm, respectively. Data are represented as mean ± SD, N=10 cells from two separate experiments, statistically  
 329 tested with a one-way ANOVA with the Tukey's multiple comparison's post-hoc test \*\*\**p* ≤ 0.001. V is a Schematic  
 330 representation of the proposed distribution of N- and C-terminal Bassoon immunosignals at the TGN. Scale bars 2µm (B) and  
 1µm (C–S).

331 Bsn-RFP (43.7%; Fig. 5A–Q). The distance analysis also revealed a similar pattern  
 332 compared to what was seen for TGN38: a significantly larger fraction of intramolecular  
 333 N-terminal than C-terminal Bassoon signals of single- (0.8±0.03 SD) and double-  
 334 tagged (0.71±0.02 SD) Bassoon constructs were distributed within the 0–100nm  
 335 distance range (Fig. 5R). Again, the C-terminal tags of both constructs were more  
 336 evenly distributed between the two distance categories, and again with a tendency  
 337 towards localization in the 101nm–1µm range, i.e., a slight majority of C-terminal  
 338 Bassoon signals of the single- (0.62±0.03 SD) and double-tagged (0.65±0.04 SD)

339 constructs were present in the 101nm—1 $\mu$ m range from the nearest Syn6 signal (Fig.  
 340 5R). These results show that Bassoon molecules possess similar colocalization and  
 341 distance distribution relative to both Syn6 and TGN38 markers of the TGN. This  
 342 suggests that Bassoon molecules are similarly oriented all over the TGN lamellae, with  
 343 the N-terminus more closely associated with the TGN membrane than the C-terminus.

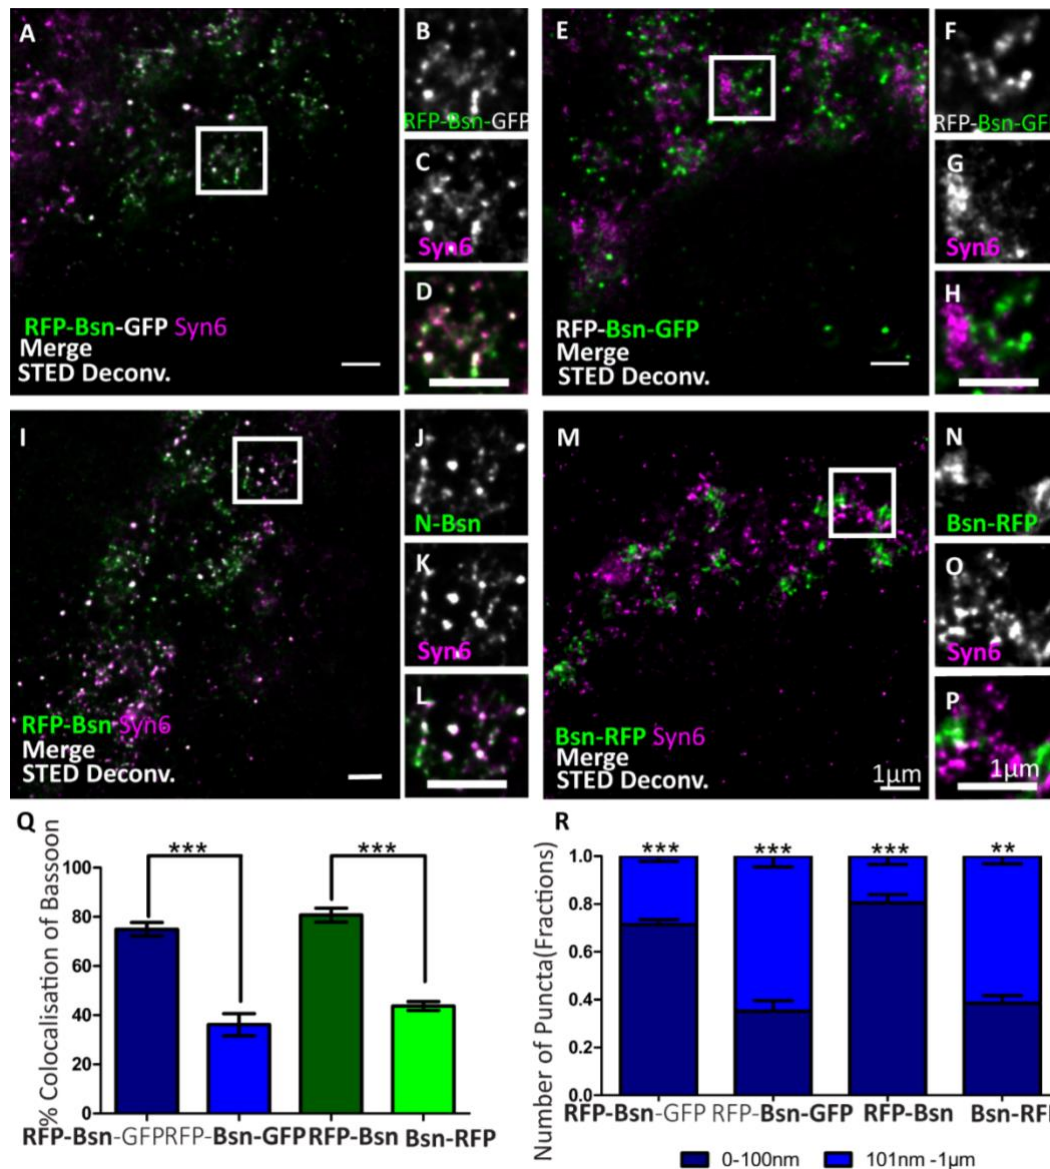

344 **Figure 5. Orientation double- and single-tagged Bassoon constructs at the *trans*-Golgi network marker Syntaxin 6 (Syn6).**  
 345 Transfected DIV7 hippocampal neurons immunostained for either one or both termini of full-length Bassoon with RFP-  
 346 nanobody-Atto594 / GFP-nanobody-Atto647 and the Syn6 marker. Two-color, deconvolved, 10  $\mu$  mX10  $\mu$  m STED images and  
 347 their ROI zooms, show double-tagged and single-tagged Bassoon constructs in panels A—D and I—L (of which the N-termini  
 348 of constructs were imaged) and panels E—H and M—P (of which the C-termini of the constructs were imaged), respectively.  
 349 Graph Q quantifies the amount of Bassoon colocalization with Syn6 and graph R quantifies the Bassoon signal allocations at  
 350 and away from TGN38 lamella i.e., 0—100nm or 101nm—1  $\mu$  m, respectively. Data are represented as mean  $\pm$  SD, N=10 cells  
 351 from two separate experiment, statistically tested with a one-way ANOVA with the Tukey's multiple comparison's post-hoc  
 352 test \*\*p  $\leq$  0.01 and \*\*\*p  $\leq$  0.001. Scale bars 1  $\mu$  m (A—P).

353

### 354 Which domains of Bassoon are involved in orienting the molecule?

355 Next, we aimed at characterizing the features of Bassoon required for bringing the N-  
 356 terminal region of Bassoon into close apposition to the TGN. N-myristoylation is an  
 357 obvious possibility for anchoring a protein to membranes. Therefore, we generated a  
 358 point mutated version of the dually tagged Bassoon construct, called G2A-Bsn, where

359 we replaced glycine in position 2 with alanine. Dual color STED images of TGN38 and  
360 the intramolecular N-terminal tag or the C-terminal tag of G2A-Bsn revealed the  
361 previously seen pattern of high colocalization of the intramolecular N-terminal tag  
362 (74.5%) and low colocalization (28.2%) of the C-terminal tag with TGN38 (Fig. 6A-H,  
363 Q). Signals from the intramolecular N-terminal tag were predominantly (fraction size  
364  $0.75 \pm 0.02$  SD) located within 0 - 100nm from the TGN38, while the majority of signals  
365 from the C-terminal tag (fraction size  $0.75 \pm 0.02$  SD) were distributed within 101nm-  
366 1 $\mu$ m from the TGN (Fig. 6R). A functional N-myristoylation site is thus not necessary  
367 for the orientation of recombinant Bassoon at the TGN. These results do not exclude  
368 the possibility that the G2A-mutant recombinant Bassoon dimerizes with endogenous  
369 Bassoon, and that the intact endogenous Bassoon somehow helps orienting the N-  
370 terminus of the mutant protein. However, when we expressed G2A-Bsn in cultures  
371 obtained from mice lacking Bassoon the intramolecular N-terminal tag of G2A-Bsn was  
372 still oriented towards the TGN, further corroborating that a functional N-myristoylation  
373 site is not necessary for the orientation of Bassoon at the TGN (Suppl. Figure 2).

374 Since an intact N-myristoylation consensus site was not required for the  
375 orientation of Bassoon, we wondered if any other sequences upstream of the  
376 intramolecular N-terminal tag were required for the orientation of Bassoon. To test this,  
377 we expressed the previously generated GFP-Bsn95-3938 construct aka GFP-95-Bsn.  
378 In this construct, the N-terminal 94 amino acids are replaced by EGFP, but it  
379 accumulates at the Golgi-apparatus and at synapses (Dresbach et al., 2003; Dresbach  
380 et al., 2006). The EGFP tag of this construct, detected by our GFP-nanobody,  
381 displayed remarkably low colocalization with TGN38 at the nanoscopical level (Fig. 6  
382 I-L). Its colocalization with TGN38 was 36.2% and the majority of these signals  
383 ( $0.60 \pm 0.04$  SD) were located farther than 100 nm from the nearest TGN38 signals (Fig.  
384 6Q,R ), suggesting that sequences in the first 94 amino acids contribute to orienting  
385 the N-terminal area of Bassoon towards the TGN.

386 A central region of Bassoon, comprising amino acids 2088-2563 and termed Bsn-GBR  
387 (for Golgi-binding region), is required for targeting Bassoon to the Golgi-apparatus.  
388 Thus, this region may contribute to bringing parts of Bassoon into close proximity to  
389 the TGN. A construct consisting of these amino acids fused to the C-terminus of EGFP  
390 indeed targets to the Golgi-apparatus, presumably via dimerization with endogenous  
391 Bassoon (Dresbach et al., 2006; Maas et al., 2012). Where is this construct located  
392 relative to TGN38 at the nanoscopical level? Our STED analysis revealed a relatively  
393 low colocalization with TGN38 (41.5%) and predominant signal allocations ( $0.67 \pm 0.03$   
394 SD) in the 101nm—1 $\mu$ m distance range from TGN38 signals (Fig. 6. M-P and Q,R).  
395 Thus, this region alone, while harboring Golgi-targeting capacity, cannot account for  
396 the close apposition of the N-terminal Bassoon regions to the TGN.

397 Together, these results indicate that neither of the two regions of Bassoon equipped  
398 with known Golgi-targeting sequences, i.e., the N-myristoylation consensus site and  
399 amino acids 2088-2563, account for the particular orientation of Bassoon at the TGN.  
400 Instead, the first 94 amino acids of Bassoon contribute to orienting the N-terminal  
401 region of Golgi-associated Bassoon towards the TGN.

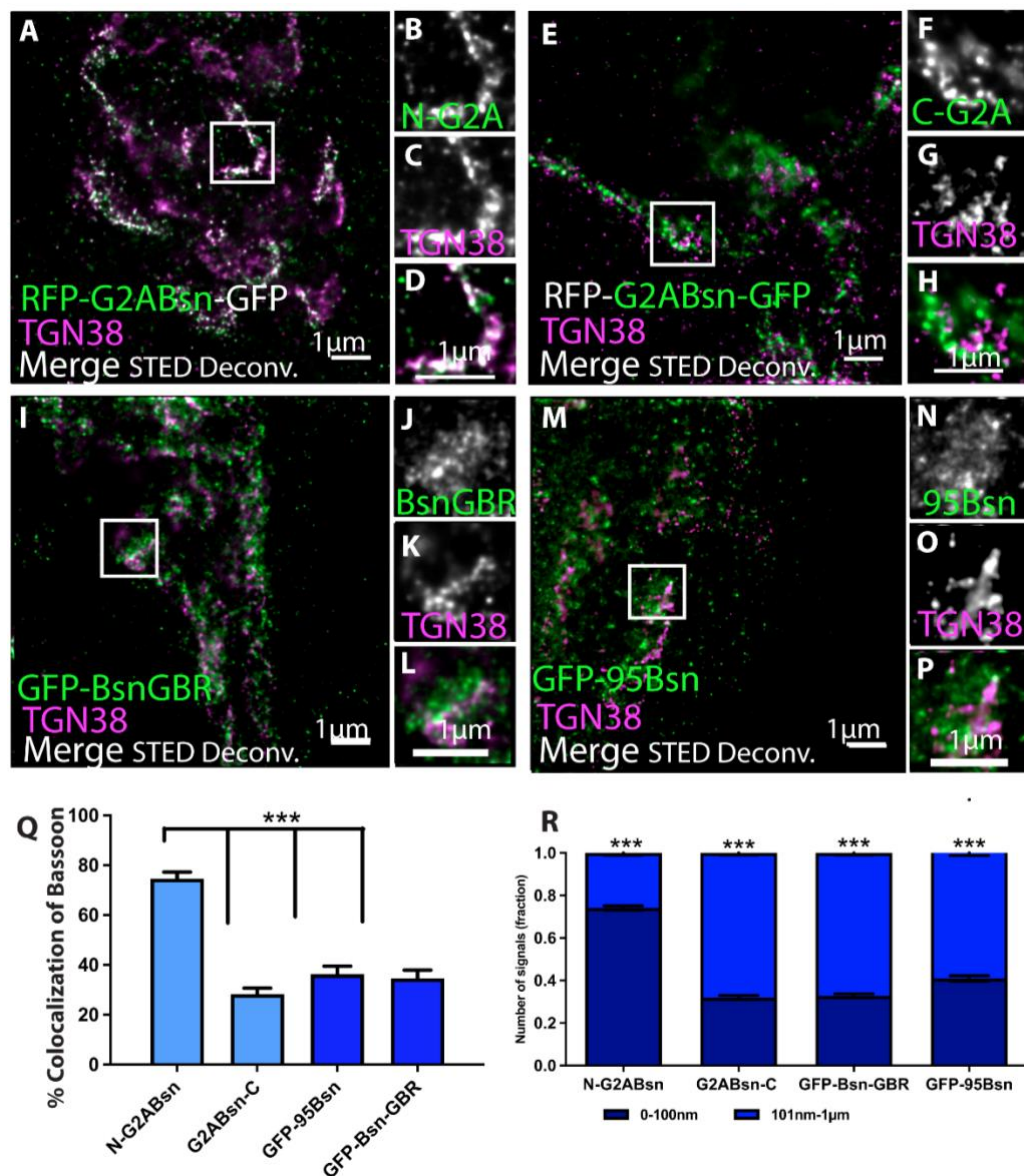

403 **Figure 6. Orientation of deletion constructs of Bassoon at the *trans*-Golgi network.**  
 404 DIV7 hippocampal neurons transfected with tagged Bassoon deletion constructs a) myristoyl group deficient G2A-mRFP-Bsn-  
 405 mEGFP (A–H), Bassoon’s N–terminus, i.e., (95-3938) 95-Bsn construct (I–L), and Bassoon’s N– and C–termini (2088-2038),  
 406 i.e., Bsn-GBR construct (M–P) were visualized with a GFP-nanobody-Atto647 / RFP-nanobody-Atto594 and TGN38 marker.  
 407 Insets of the two-color STED deconvolved images in A, E, I and M are represented in panels B–D, F–H, J–L, and N–P,  
 408 respectively. Graph Q and R quantifies the colocalization and signal allocations of Bassoon at the TGN38, respectively. Data  
 409 are represented as mean± SD, N=10 cells from two separate experiment, statistically tested with a one-way ANOVA with the  
 410 Tukey’s multiple comparison’s post-hoc test \* $p < 0.05$  & \*\*\* $p \leq 0.001$ . Scale bars 1µm (A–P).  
 411  
 412

### 412 Estimating the extension of Bassoon molecules at the TGN

413 Having analyzed the distribution of N- and C-terminal tags over two distance  
 414 categories, i.e., within 100 nm of TGN38 signals and between 101 nm and 1 µm from  
 415 the TGN, we wondered whether we might be able to extract the average distance  
 416 between a tag and TGN38 from the data sets. Figure 7A shows the distances of signals  
 417 relative to TGN38 obtained from all Bassoon constructs and tags, displayed as violin  
 418 plots.

419 The analysis shows that most signals were located within 220 nm from the TGN,  
 420 irrespective of the construct and tag. Among these signals, two differences between  
 421 the constructs were obvious: first, the median of the values for distance from TGN38  
 422 was smaller for the intramolecular N-terminal tags, both in the dually tagged construct

423 and in the single tagged construct, compared to all other constructs; second, wider  
424 sections of the violin plot, representing a higher probability that data in the population  
425 take on a certain value, indicated a clustering of intramolecular N-terminal signals close  
426 to TGN38. In contrast, all other construct showed a more uniform distribution of signals  
427 across the 0-220 nm range (Fig. 7A). We then analyzed the signals from this 0-220 nm  
428 range to extract the average distances for each of the constructs and tags from TGN38  
429 (Fig. 7B). In dually tagged Bassoon, average distances from TGN38 were 69 nm for  
430 the intramolecular N-terminal tag and 115 nm for the C-terminal tag. Thus, amino acid  
431 97 of Bassoon, where the intramolecular N-terminal tag is located, and amino acid  
432 3938, where the C-terminal tag is located, are estimated to be 46 nm from each other.  
433 In single tagged constructs, the intramolecular N-terminal tag was on average 48 nm  
434 away from TGN38, the C-terminal tag was 100 nm away. This yields an estimated  
435 distance of 52 nm between the average location of the two tags. The average distances  
436 from TGN38 of GFP-Bsn95-3938 (106 nm) and Bsn-GBR (115 nm) show that the tags  
437 of these deletion constructs occupy similar locations compared to the C-terminal tags  
438 of full-length Bassoon constructs (Fig. 7B).

439 In summary, both transfection of a dually tagged construct and separate transfections  
440 of single tagged constructs lead to similar conclusions: first, the intramolecular N-  
441 terminal tag is located closer to TGN38 than the C-terminal tag; second, the average  
442 distance from TGN38 is between 48 nm and 69 nm for the intramolecular N-terminal  
443 tags; the average distance from TG38 is between 100 nm and 115 nm for the C-  
444 terminal tags; third, the distance between the intramolecular N-terminal and the C-  
445 terminal tag is estimated to be between 46 nm and 52 nm. Overall, this indicates an  
446 orderly arrangement of Bassoon molecules with the N-terminus facing the TGN  
447 membrane (Fig. 7C).

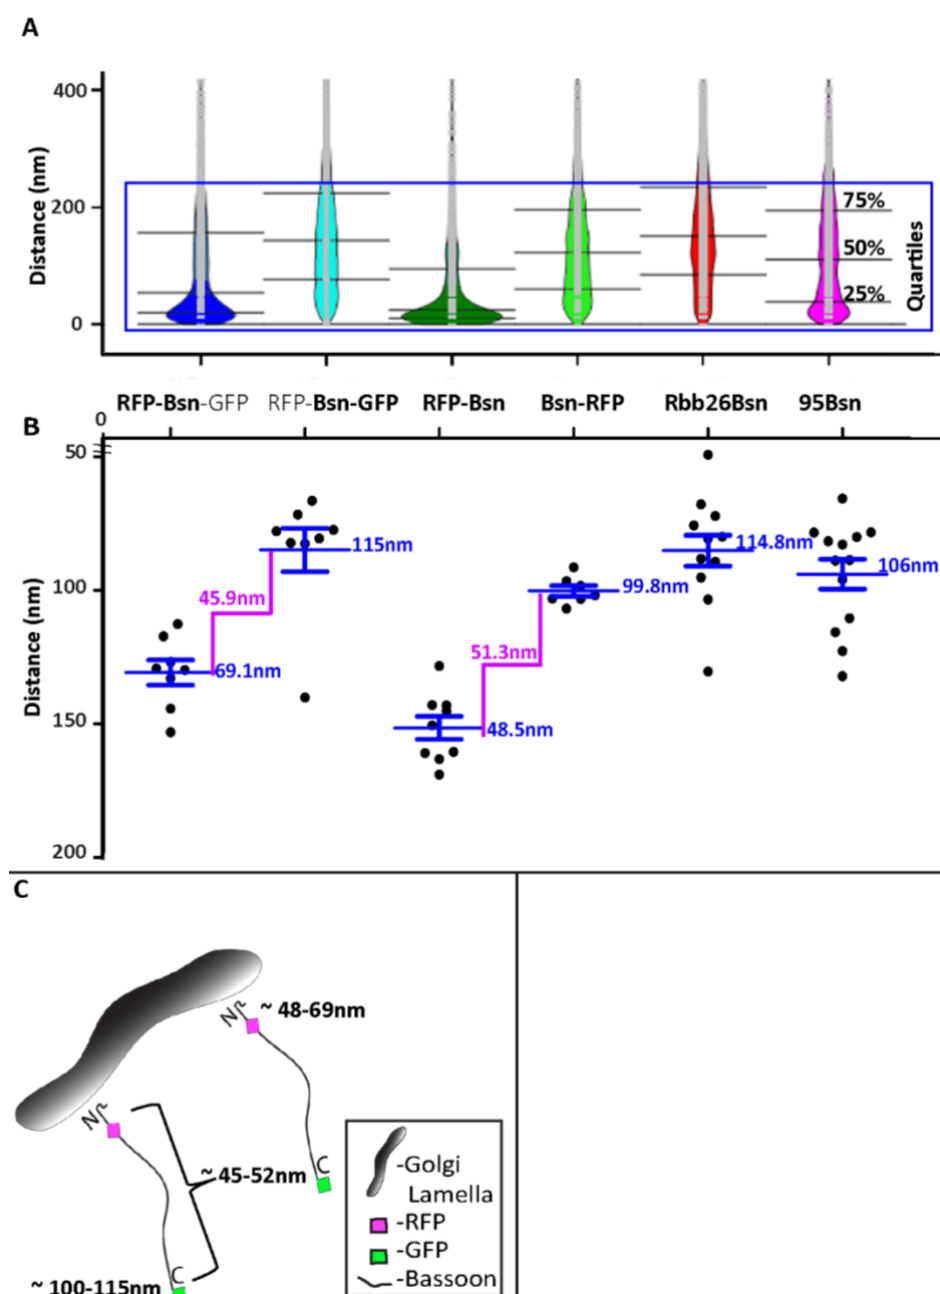

448  
449  
450  
451  
452  
453  
454  
455  
456

**Figure 7. Distribution and average distances of all full-length and mutant Bassoon signals from the TGN38 reference maker.** Bean plots in panel **A** display all signal distributions of single- and double-tagged full-length and deletion constructs of Bassoon from their nearest TGN38 marker. The light grey lines within each individual bean plot show individual observations of Bassoon signals. The blue ROI represents the 220nm range that corresponds to 75% of the total Bassoon signals oriented around the TGN lamella (**A**). The average distances of the Bassoon tags of all five constructs, within the 200nm distance range, are plotted in **B**. **C** is a schematic diagram that shows the average distance N and C-termini of full-length Bassoon molecules possess at the TGN lamella.

## 457 **Discussion**

458

459 Bassoon is a presynaptic scaffold protein predicted to be up to 80 nm long  
460 (Gundelfinger et al., 2016). At active zones, Bassoon appears to have an extended  
461 conformation with its C-terminus facing the plasma membrane (Dani et al., 2010;  
462 Limbach et al., 2011). At synapses, Bassoon may thus represent one of the  
463 filamentous structures or dense projections characteristic of active zones (Phillips et  
464 al., 2001; Dresbach et al., 2001). Here, we find that recombinant Bassoon expressed  
465 in cultured hippocampal neurons, has an extended conformation at the Golgi-  
466 apparatus. At this subcellular site, the N-terminus of Bassoon faces the TGN  
467 membrane. The fact that Bassoon is an extended protein already at this early stage of  
468 its trafficking path supports the notion that primordial active zone scaffolds assemble  
469 at the Golgi-apparatus (Dresbach et al., 2006). Its orientation relative to membranes -  
470 i.e., with the N-terminus facing the TGN membrane, and the C-terminus facing the  
471 active zone plasma membrane – adds new insights and raises questions regarding the  
472 topology of its trafficking from the Golgi apparatus to active zones.

473

### 474 **Design of new Bassoon constructs**

475 We performed this study using a new generation of full-length Bassoon constructs.  
476 These constructs were designed to have several advantages. First, the C-terminal tag  
477 of these constructs does not produce diffusely distributed fluorescence anymore. This  
478 allows for better detection of punctate signals because these are not hidden in a cloud  
479 of homogeneous cytoplasmic background fluorescence anymore. We do not know  
480 what caused this background in previous constructs (Dresbach et al., 2003).  
481 Proteolytic cleavage of the C-terminal tag is a possible cause. But here we found that  
482 there is diffusely distributed green fluorescence when the GFP sequence is attached  
483 out of frame to the 3' end of full-length Bassoon, suggesting that a cryptic translation  
484 initiation sequence may be present in the 3' area of the classical construct. By  
485 removing the start codon of GFP we eliminated this possibility. Second, to reduce the  
486 probability of artificial aggregation we used monomeric versions of fluorescent  
487 proteins, i.e., mRFP and the A207K variant of EGFP. Third, all new constructs have a  
488 free N-terminus, thus leaving the N-myristoylation consensus site of Bassoon  
489 (Dresbach et al., 2003) intact.

490

491 To introduce a tag close to the N-terminus, but outside the N-myristoylation consensus  
492 sequence, we placed mRFP or mGFP downstream of amino acid 97 in the new  
493 Bassoon constructs. In particular, the intramolecular tag is preceded by amino acids  
494 1-97 of Bassoon and followed by amino acids 95-3938 of Bassoon. Originally, this  
495 location was chosen because it contains a conveniently located HindIII cloning site in  
496 rat Bassoon cDNA. Later it became clear that the first 94 amino acids appear to be a  
497 structurally compact unit without persistent folding (Gundelfinger et al., 2016). Glycine  
498 and proline constitute 48 percent of the first 94 amino acids of rat Bassoon (25 glycine  
499 residues and 20 proline residues), while this percentage steeply drops to 18 percent in  
500 amino acids 95-197. Because of the location of the intramolecular tag, the new full-  
501 length constructs are expected to combine the properties of two previously  
502 characterized constructs: Amino acids 95-3938 preceded by EGFP are correctly  
503 targeted to the Golgi-apparatus and to synapses (Dresbach et al., 2003; Bresler et al.,  
504 2004; Dresbach et al., 2006; Tsuruel et al., 2009), and amino acids 1-97 followed by  
505 EGFP retain targeting capacity for the Golgi-apparatus through their N-myristoylation  
506 site (Dresbach et al., 2003; Dresbach et al., 2006). To avoid problems sometimes



507 associated with co-expression, one of our new constructs is dually tagged, with an N-  
508 terminal intramolecular mRFP and C-terminal mGFP.

509

### 510 **Validating the constructs**

511 All constructs accumulated at the Golgi-apparatus and at presynaptic terminals, as  
512 expected (Dresbach et al., 2003; Dresbach et al., 2006). Moreover, their resistance to  
513 extraction with Triton X100 indicates their proper incorporation into the CAZ network  
514 at synapses (Dresbach et al., 2003). Colocalization levels with the synapse markers  
515 Piccolo and Synaptophysin was between 62 percent and 85 percent, and is likely  
516 underestimated due to rigorous thresholding. The remaining, non-synaptic puncta are  
517 probably mobile transport units. This is expected for Bassoon, which traffics on mobile  
518 units (Shapira et al., 2003, Bresler et al. 2004) and undergoes activity-induced synapse  
519 recruitment to synapses from kinesin-1 – motor dependent axonal carriers (Cai et al.,  
520 2007). In addition, we verified by conventional and by STED microscopy that the dually  
521 tagged construct was enriched at synapses based on co-localization, in confocal  
522 images, with the postsynaptic markers PSD95 and Shank-2/ProSAP1. STED  
523 microscopy revealed that this construct was oriented with its C-terminus towards the  
524 active zone, as previously shown for endogenous Bassoon (Dani et al., 2010). Thus,  
525 we conclude that the novel constructs undergo proper subcellular targeting, that the  
526 dually tagged construct adopts the predicted orientation at synapses, and that the two  
527 tags can be spatially resolved at subcellular sites where Bassoon has an extended  
528 conformation.

529 Our use of recombinant protein bears the inherent caveat of overexpression.  
530 However, recombinant Bassoon has been used widely by us and others to monitor  
531 synapse assembly and turnover (Shapira et al., 2003; Cai et al., 2007; Lee et al., 2008;  
532 Tsuruel et al., 2009; Matz et al., 2010). In addition, our recombinant proteins  
533 accumulated at the expected subcellular sites, and the dually tagged construct showed  
534 the expected orientation at the synapse. The design of the constructs also provides  
535 several advantages. Under ideal expression conditions the location of the N-terminal  
536 intramolecular tag (downstream of amino acid 94) and the C-terminal tag (downstream  
537 of amino acid 3938) should report the maximal extension of Bassoon more accurately  
538 compared to the routinely used antibodies, whose epitopes are located between amino  
539 acids 756 and 1001 and between amino acids 3908 and 3938 (e.g., Dani et al., 2010).  
540 Indeed, we observed a distance of 46—52 nm between the tags, compared to 30 nm  
541 distance calculated for the two epitopes in Dani et al., 2010. This is consistent with the  
542 tags being farther apart within recombinant Bassoon than the two epitopes are in  
543 endogenous Bassoon. We emphasize, however, that Dani et al., 2010 performed an  
544 extensive 3D analysis of a large number of synapses in brain sections, while we only  
545 performed a proof-of-principle analysis for our construct, analysing a set of synapses  
546 that appeared to be visible as side views in our cultured neurons.

547 Using nanobodies to detect the tags provides an additional advantage: because  
548 of their small size and direct coupling to fluorophores, nanobodies bring the fluorescent  
549 dye closer to the epitope compared to indirect immunofluorescence using primary and  
550 secondary antibodies. The subclusters of recombinant Bassoon we detected with  
551 nanobodies are consistent with this increased spatial resolution. Maybe these  
552 nanobodies detect Bassoon arranged in the presynaptic particle web (Phillips et al.,  
553 2001). Overall, we conclude that our analysis of recombinant Bassoon at synapses  
554 yields results consistent with previous observations and shows that our approach  
555 provides at least similar spatial resolution as previous nanoscopical approaches.  
556 Based on these assumptions we conducted our detailed analysis of recombinant  
557 Bassoon at the Golgi-apparatus.

558

### 559 **Trans Golgi versus trans-Golgi network**

560 STED microscopy revealed that recombinant Bassoon colocalizes with two TGN  
561 markers, i.e., TGN38 and Syntaxin-6, but not with a TG sub-compartment marker. This  
562 supports and extends previous data showing that both endogenous and recombinant  
563 Bassoon colocalize with TGN38 and Syntaxin 6 upon confocal analysis (Dresbach et  
564 al., 2006; Maas et al., 2012). This further corroborates that the recombinant protein  
565 faithfully represents the localization of endogenous Bassoon. In addition, it narrows  
566 down the exact localization of recombinant Bassoon by showing that it is more closely  
567 associated with the TGN than with the sub-compartment. This observation is  
568 particularly insightful because the recombinant sub-compartment marker we have  
569 used here was shown by electron microscopy to selectively label the most “trans”  
570 located lamellae of the Golgi stack, i.e., the one immediately preceding the TGN  
571 (Wittenmayer, 2014).

572

### 573 **Localization and orientation of full-length Bassoon at the trans-Golgi network**

574 A key finding of our study is that the N-terminal, intramolecular tag of Bassoon was  
575 located closer to the TGN than the C-terminal tag. This was true both for the dually  
576 tagged Bassoon and for the two constructs that carried single mRFP tags. In addition,  
577 it was true both when we used TGN38 and when we used Syntaxin-6 as TGN markers.  
578 Finally, both colocalization analysis and the distance distribution of the Bassoon  
579 constructs indicated this. Thus, recombinant Bassoon is an extended protein located  
580 at the TGN, with the N-terminal area closer to the TGN than the C-terminus, and the  
581 majority of Bassoon molecules have this orientation.

582 The distance distribution also revealed that the N-terminal, intramolecular, tag  
583 had a higher likelihood of being located within 100 nm nanometers from the TGN than  
584 being located inside the 100 nm – to 1  $\mu$ m range, whereas the C-terminal tag appeared  
585 to be distributed more evenly between the two distance regimes. On average, the two  
586 tags were located 46 nm away from each other in the dually tagged construct, and 52  
587 nm away from each other when the two single tag constructs were compared. A  
588 distance of approximately 50 nm between the intramolecular tag and the C-terminal  
589 tag is well within the range of the 80 nm maximal extension of Bassoon predicted by  
590 Gundelfinger et al. (2016). It is also consistent with the two tags being farther apart  
591 within the primary structure of Bassoon than the two antibody epitopes used in Dani et  
592 al. (2010), who estimated a distance of 30 nm between those epitopes based on  
593 STORM data. Taken together, our data indicate that recombinant Bassoon is an  
594 extended protein located at the TGN, with its N-terminal area oriented towards the  
595 TGN membrane and the C-terminus farther away. In addition, they suggest an average  
596 distance of 46-52 nm between the intramolecular tag located downstream of amino  
597 acid 97 and the C-terminal tag located downstream of amino acid 3938 of rat Bassoon.

598

### 599 **Localization and orientation of deletion constructs**

600 Bassoon includes at least two regions with binding capacity for the Golgi-apparatus,  
601 including the myristoylated N-terminus and the region spanning amino acids 2088-  
602 2563 called the Golgi-binding region (GBR). Using conventional epifluorescence  
603 microscopy, we had previously detected constructs encoding either one of these  
604 regions at the TGN (Dresbach et al., 2003; Dresbach et al., 2005). The results obtained  
605 from analyzing mutated constructs of Bassoon provided some novel insights and  
606 raised new questions.

607 First, the myristoylation-deficient G2A point mutant was still oriented with its N-  
608 terminus towards the TGN, even in Bassoon knockout cultures. Thus, insertion of

609 myristic acid into the lipid bilayer is not required for the orientation of the N-terminal  
610 region of Bassoon towards the TGN. Through its second coiled-coil domain the G2A-  
611 mutant full-length protein may still bind to endogenous Piccolo (Maas et al., 2012). But  
612 it is unlikely that this helps orienting the N-terminus of Bassoon towards the TGN,  
613 because another construct, GFP-Bsn95-3938, that is also predicted to bind to  
614 endogenous Bassoon and Piccolo, showed an aberrant orientation. Thus, N-  
615 myristoylation appears to be dispensable for the orientation of Bassoon.

616 Second, as mentioned above, GFP-Bsn95-3938 was less closely associated  
617 with the TGN than the intramolecular tag in the full-length Bassoon constructs. This  
618 shows that the N-terminal 97 amino acids of Bassoon are essential for orienting the N-  
619 terminus of Bassoon towards the TGN. It is likely that the unusually high percentage  
620 of glycine and proline characteristic of this region of Bassoon contributes to this, but  
621 the mechanisms and putative binding partners providing this orientation have yet to be  
622 discovered. Surprisingly, the tag in GFP-Bsn95-3938 was located unexpectedly far  
623 away from the TGN and was rather distributed like the C-terminal tag of the full-length  
624 construct. We do not know if some extensive bending of the N-terminal end of this  
625 construct towards its C-terminus or a completely aberrant localization account for this.

626 Third, Bsn-GBR showed a similar localization. This construct includes the  
627 second coiled-coil domain of Bassoon, located between amino acids 2246 and 2366  
628 of rat Bassoon (tom Dieck et al., 1998). Bsn-GBR harbors binding capacity for an  
629 unknown target site on the Golgi-apparatus and, in addition, dimerizes or oligomerizes  
630 with endogenous Bassoon through the CC2 domain (Dresbach et al., 2006; Maas et  
631 al., 2012). Therefore, we expected that this construct might bind to the TGN or to a  
632 central region of endogenous Bassoon or both. In particular, we aimed to find out if  
633 Bsn-GBR locates to the same TGN site that the N-terminus of Bassoon locates to.  
634 However, this construct was located farther away from the TGN than the intramolecular  
635 tag of Bassoon and had a similarly widespread distribution like the C-terminal tag of  
636 full-length Bassoon.

637 What may account for this localization? Bassoon and Piccolo are required for  
638 the biogenesis of Golgi-derived transport vesicles, called gPTVs, that also contain the  
639 scaffold protein ELKS2 (Maas et al., 2012). Bassoon binds to ELKS2 through its CC3  
640 regions, to the Golgi apparatus through at least two regions, and to CTBP1, a protein  
641 involved in the fission of vesicles budding from the Golgi-apparatus. Thus, Bassoon is  
642 endowed with binding capacity for proteins that together could, theoretically, mediate  
643 the generation and fission of gPTVs. Overexpressing Bsn-GBR causes the  
644 accumulation of Bassoon, Piccolo and ELKS2 at the Golgi-apparatus. Bsn-GBR  
645 prevents forward trafficking of gPTVs either by preventing binding of endogenous  
646 Bassoon to the Golgi-apparatus, or by impairing oligomerization of Bassoon and  
647 possibly Piccolo (Maas et al., 2012). Hence, a complex situation may arise where  
648 endogenous proteins gPTVs accumulate and where, in addition, endogenous proteins  
649 may be misplaced, when Bsn-GBR is overexpressed. Therefore, the relatively  
650 widespread distribution of Bsn-GBR at the nanoscopical level may reflect this construct  
651 binding to its target sites in a condition of reduced gPTV exit from the Golgi.

652 Overall, our results show, that at the nanoscopical level the Bsn-GBR does not  
653 bind to the same TGN-region as the N-terminus of Bassoon. Thus, the two Golgi-  
654 binding regions of Bassoon seem to associate with distinct sites at the Golgi-  
655 apparatus, and the N-terminal 95 amino acids fulfil a special role in orienting the N-  
656 terminus towards the TGN.

657  
658 **Perspective: towards a topological scenario**

659 At active zones, the C-terminus of Bassoon is located closer to the plasmamembrane  
660 than the N-terminus (Dani et al., 2010; our study). Assuming that Bassoon travels to  
661 active zones on Golgi-derived Piccolo-Bassoon transport vesicles (gPTVs; Zhai et al.,  
662 2001; Maas et al., 2012) one might predict that the C-terminus of Bassoon is attached  
663 to Golgi-membranes and subsequently to the gPTV membrane; deposition of Bassoon  
664 at synapses, perhaps by exocytotic fusion of the transport vesicle with the presynaptic  
665 plasmamembrane, would then directly place the C-terminus close to the active zone  
666 membrane. This scenario is “simple” because it involves no topological  
667 rearrangements, i.e. the C-terminus of Bassoon is attached to equivalent membranes  
668 all along the trafficking route.

669 However, we find here that the N-terminus of Bassoon is oriented towards the  
670 TGN membrane, while the C-terminus is located farther away from it. This would be  
671 consistent with the following scenario, which also involves no topological  
672 rearrangements: at the Golgi-apparatus, the N-terminus of Bassoon may be attached  
673 to TGN-associated synaptic vesicle precursor membranes, while the C-terminus may  
674 become attached – simultaneously or later – to gPTVs. In this way, Bassoon would  
675 travel out of the soma on gPTVs and at the same time carry along synaptic vesicle  
676 precursors via its N-terminal region. This speculative scenario is consistent with  
677 several observations. First, Bassoon constructs lacking N-terminal areas appear at  
678 synapses as small spots the size of Piccolo immunosignals, suggesting that these  
679 constructs incorporate into the active zone cytomatrix immediately adjacent to the  
680 plasmamembrane; in contrast, a construct comprised of the N-terminal 609 amino  
681 acids of Bassoon appears at synapses as larger spots similar to the size of entire  
682 synaptic vesicle clusters, suggesting that this N-terminal region of Bassoon may bind  
683 to synaptic vesicles (Dresbach et al., 2003). Second, clouds of clear-core vesicles,  
684 dense-core vesicles and Bassoon were detected by electron immune-electron  
685 microscopy in axons (Tao-Cheng, 2007). It is possible that the dense core vesicles  
686 may represent gPTVs while the clear-core vesicles represent synaptic vesicle  
687 precursors. Third, a substantial fraction of synaptic vesicles precursors, labelled by  
688 recombinant Synaptophysin and called synaptic vesicle transport vesicles (STVs) in  
689 this study, co-traffics with active zone precursors, labelled by recombinant Bassoon,  
690 as revealed by live imaging studies (Bury and Sabo, 2011; Bury and Sabo, 2015).  
691 Recently, a type of Golgi-derived precursor vesicle called PLV, for presynaptic  
692 lysosome related vesicles, was identified. PLVs are required for the transport of  
693 presynaptic material. They carry, in addition to lysosomal proteins, the synaptic vesicle  
694 protein VGlut1 and co-traffic with Bassoon (Vukoja et al., 2018). Thus, at the Golgi-  
695 apparatus Bassoon could connect to PTVs via its C-terminus and to synaptic vesicle  
696 precursors via its N-terminus, and in this way generate already at the Golgi-apparatus  
697 a topological scenario that is later encountered at active zones. Whether this scenario  
698 holds true will need to be investigated in future studies.

699  
700  
701  
702

## 703 **Materials and Methods**

704

### 705 **Animals**

706 Cells and tissues used in the study were obtained from bassoon gene trap (Bsn<sup>GT</sup>)  
707 (Hallermann et al., 2010); mouse strains backcrossed over more than 10 generations  
708 to C57BL/6N. Bsn<sup>GT</sup> mice were obtained from Omnibank ES cell line OST486029 by  
709 Lexicon Pharmaceuticals, Inc. (The Woodlands, TX). All experiments were performed  
710 in accordance with the European Committees Council Directive (86/609/EEC) and  
711 approved by the local animal care committees (Landesverwaltungsamt Sachsen-  
712 Anhalt, Germany, and the State Government of Lower Saxony, Germany).

713

### 714 **Antibodies**

715 The following antibodies were used for immunocytochemistry (IC): mouse anti-  
716 Bassoon (1:500 ENZO life systems), rabbit anti-Piccolo(1:200 Synaptic systems),  
717 mouse anti-TGN38 (1 to 500BD-Transduction Laboratories), mouse anti-Syntaxin 6  
718 (1:300 Abcam), chicken anti-GFP (1: 3000 Abcam), rabbit anti-GFP (1: 1000 Abcam),  
719 mouse anti-Synaptophysin (1: 1000 Sigma Aldrich), guinea pig anti-SHANK2 (1 to  
720 1000 Synaptic systems), Nanobodies: RFP-Booster-Atto594 and GFP-Booster-  
721 Atto647 (1:300 Chromotek), Mouse AlexaFluor®647 (1:1000 for Epifluorescence  
722 microscopy/1:100 for STORM Invitrogen), Chicken Cy5.5 (1:150 for STORM  
723 Jackson/Invitrogen), Chicken and Rabbit Alexa Fluor®488 (1:1000 Invitrogen), ATTO-  
724 TEC dyes: Mouse AttoKK1212 and Mouse Atto594 (1: 100) and Abberior dyes: Mouse  
725 STAR 638, Mouse STAR 635p and Rabbit STAR 639 (1: 100).

726

### 727 **Full-length Bassoon constructs**

728 Full-length rat Bassoon constructs mRFP-Bsn-mEGFP, mEGFP-Bsn, Bsn-mEGFP,  
729 mRFP-Bsn, Bsn-mRFP, and mutant G2A-mRFP-Bsn-mEGFP were created in the  
730 ampicillin-resistant pCS2<sup>+</sup> vector backbone and designed to include either an  
731 intramolecular mRFP/mEGFP tag and/or a mEGFP/mRFP fused to the C-terminus of  
732 Bassoon. The intramolecular tag was created by gene synthesis in a way that its coding  
733 sequence, after insertion into the HindIII site of rat Bassoon, was preceded by amino  
734 acids 1-97 of Bassoon and was followed by amino acids 95-3938 of Bassoon. We  
735 generated the G2A-mRFP-Bsn-mEGFP myristoyl mutant by inserting a point mutant  
736 at the second amino acid position, thereby replacing a glycine amino acid with alanine  
737 in the sequence of the full-length mRFP-Bsn-mEGFP construct. The plasmid called  
738 “CFP-Golgi” (containing amino acids 1–81 of  $\beta$ -1,4glycosyltransferase) was originally  
739 purchased from Clontech.

740 Bassoon-mRFP was cloned by replacing mEGFP of the Bassoon-mEGFP construct  
741 with an mRFP tag using the Mlu and SpeI sites. Similarly, mEGFP-Bassoon was  
742 cloned by replacing mRFP-Bassoon by inserting a mEGFP, at the intramolecular 97<sup>th</sup>  
743 amino acid position, by using the HindIII site. CFP- $\beta$ -1,4glycosyltransferase (amino  
744 acids 0—81), also known as CFP-Golgi was generously provided by also Craig Garner.  
745 Bassoon-mRFP was cloned by replacing mEGFP of the Bassoon-mEGFP construct  
746 with an mRFP tag from the Mlu-mRFP-SpeI-PUC vector (Clontech). Both constructs  
747 were linearized via a Mlu and SpeI digestion, followed by a CIP dephosphorylation and  
748 ligated. The ligation mix was transformed into XL1 Blue competent cell and was grown  
749 on LB–ampicillin plates. Extracted DNA from the colonies grown on the plates were  
750 sequenced with Bsn\_FW\_1, Bsn\_FW\_3c, Bsn\_FW\_4, and Bsn\_FW\_5 sequencing  
751 primers to confirm colonies the successfully cloned and direction of insert in the  
752 construct. Similarly, we cloned mEGFP-Bassoon by replacing mRFP-Bassoon by  
753 inserting a mEGFP at the intramolecular 97<sup>th</sup> amino acid position by using the mEGFP-

754 HindIII-PUC vector (Clontech) and a HindIII digestion followed by the same protocol  
755 as described for Bassoon-mRFP generation.

756

757 Bsn\_FW\_1 CTAATGGGAGGTCTATATAAG  
758 Bsn\_FW\_2 AGCACTAGCTGGCGGCGGACA  
759 mRFP-FW-3a GTAATGCAGAAGAAGACCATG  
760 mRFP-Rev-3b CATGGTCTTCTTCTGCATTAC  
761 Bsn\_FW\_3c GGGCTTCAAGTGGGAGCG  
762 Bsn\_FW\_4 GGGCCAGGAGGAGACAGACG  
763 Bsn\_FW\_5 GCTCAAACCGGCAGCCAAAG

764

### 765 **Primary hippocampal neuron cultures**

766 Rat cultures: E19 rat hippocampi were dissected as previously described (Dresbach  
767 et al., 2006). Hippocampi were dissociated by a 20 min of trypsin treatment at 37°C  
768 and trituration. 50,000 dissociated neurons/cm<sup>2</sup> were grown on poly-lysine coated  
769 coverslips (Sigma Aldrich) in Neurobasal medium enhanced with 2% B-27 and 0.5%  
770 L-Glutamine (Life technologies). Primary hippocampal neurons growing on either  
771 12mm or 18mm coverslips, in 24-well or 12-well plates, respectively, were transfected  
772 with the calcium phosphate method at DIV3 and fixed, with 4% paraformaldehyde, for  
773 imaging of mature DIV15—30 transfected cultures. The protocol for which was  
774 performed as described previously<sup>3</sup> (Figures 1—2, Suppl.1). Neurons were prepared  
775 for calcium phosphate transfection by replacing and saving the conditioned medium  
776 with 500µl (for 12mm coverslips) or 750µl (for 18mm coverslips) Optimem (Life  
777 Technologies) at 37°C and incubated for 20—30min. A DNA mix containing 7µg of  
778 DNA and 250mM CaCl<sub>2</sub> was vortexed during the dropwise addition of 105µl of  
779 transfection buffer (274mM NaCl, 10mM KCl, 1.4mM Na<sub>2</sub>HPO<sub>4</sub>, 15mM glucose,  
780 42mM HEPES, pH 7.06) and left to incubate for 20min at room temperature. 30µl per  
781 well of the DNA-Calcium phosphate mix was applied onto neurons and incubated  
782 further for 75min. We used three washes of pre-warmed Neurobasal medium to  
783 complete the transfection, reinstated the transfected neurons into their original  
784 conditioned medium, and incubated them at 37°C and 5% CO<sub>2</sub> until the transfected  
785 cultures had matured.

786 Mouse cultures were prepared as described (Montenegro-Venegas et al. 2021).  
787 Briefly, P0-P1 wild type mice cortexes were dissected to generate the feeder layer of  
788 a sandwich culture. Hemispheres of cortexes with their meninges removed were  
789 chopped up in 4.5 ml of HBSS and incubated for 15 minutes at 37°C in 2.5% trypsin  
790 (without EDTA). These pieces were then washed in HBSS and dissociated in glia  
791 medium that consisted of 90% plating medium and 10% DNase (Invitrogen). Both  
792 hemispheres of one brain were dissociated in 1 ml glia medium and plated in 10 ml of  
793 plating medium that was identical to rat primary culture plating medium. The medium  
794 was changed every 4—5 days, and the confluent glia were trypsinated, washed in  
795 HBSS, and 5 ml of the glia were plated on a 6cm dish. Two P1 Bsn<sup>-/-</sup> knockout mice  
796 and two wildtype Bsn<sup>+/+</sup> littermates were prepped into dissociated primary  
797 hippocampal neurons following the same protocol as was used for rat primary culture.  
798 100 ml of 5000 hippocampal cells were plated on coated 18 mm round glass coverslips.  
799 These coverslips were first incubated for 1 hour at 37°C and 5% CO<sub>2</sub> and then  
800 transferred, neurons facing down, onto dishes containing the feeder layer of glia and  
801 5 ml of culturing medium (94% Neurobasal, 2% Glutamax (Invitrogen), 2% B27, 1%  
802 NaPyr (0.1M), 1% Pen/Strep (0.1M). These coverslips were left to grow at 37°C and  
803 5% CO<sub>2</sub> and were treated with 2 µl Ara-C (Sigma) on day in vitro 1 (DIV1) and DIV3

804 to prevent glia overgrowth and were fed once a week with an exchange of 1 ml of fresh  
805 culturing medium to maintain optimal growth of the culture.

806

### 807 **Transfection**

808 To visualize Golgi association of Bassoon constructs in hippocampal neurons (Figures  
809 1, 3—6), we applied the Lipofectamine transfection method on DIV5/6 neurons and  
810 fixed them on DIV6/7 neurons with 4% paraformaldehyde, as previously described.  
811 Briefly, a conditioned medium of neurons, on 12mm coverslips, was exchanged with  
812 500ml pre-warmed Neurobasal medium, containing 2% B-27 and 1% of 2mM L-  
813 Glutamine, saved and incubated along with the neurons for 20—30min. A  
814 Lipofectamine solution and a DNA solution of 25 $\mu$ l Optimem/well (Life Technologies)  
815 with 1 $\mu$ l of Lipofectamine 2000/well (Invitrogen) and 1 $\mu$ g of plasmid DNA/well were  
816 prepared and mixed after 10min room temperature incubation. The Lipofectamine-  
817 DNA mix was further incubated for 20min at room temperature; 50 $\mu$ l/well of the solution  
818 was dropwise applied on the neurons and incubated for 75min in 37°C and 5% CO<sub>2</sub>  
819 conditions. The transfection was completed after three pre-warmed Neurobasal  
820 washes and reinstating the transfected neurons in their conditioned medium at 37°C.  
821 These neurons were fixed the next day for 20min in cold 4% paraformaldehyde solution  
822 before immunocytochemistry was performed.

823

### 824 **Immunocytochemistry**

825 Primary cultures of hippocampal neurons were washed multiple times after the  
826 paraformaldehyde fixation, blocked for 20 min with the primary antibody-buffer (10%  
827 FBS, 5% sucrose, 2% albumin, 0.3% Triton X-100 in 1 $\times$  PBS) at room temperature,  
828 and stained with the primary antibodies, diluted in the primary antibody-buffer,  
829 overnight at 4°C. Following multiple washes, secondary antibody dilutions were  
830 prepared in the secondary antibody-buffer (0.3% Triton X-100, 5% sucrose, and 2%  
831 albumin in 1 $\times$  PBS) and applied on the coverslips for 1 hour, in darkness, at room  
832 temperature. Three washed of 1xPBS and one of distilled water were performed on  
833 the coverslips before being mounted on slides with DABCO-mowiol (Calbiochem) and  
834 left to dry overnight.

835

836

### 837 **Epifluorescence microscopy**

838 An inverted Zeiss fluorescence microscope (Observer.Z1) with a Photometrics  
839 CoolSnap HQ2 camera was used to image samples at a magnification of 40X and 63X.  
840 The following filters from AHF were used: F46-000 for DAPI, F46-002 for GFP and  
841 Alexa 488, F46-004 for Atto594 and Alexa 546 dyes, and F46-006 for AttoKK1212 and  
842 Alexa 647. Exposure times of 500ns for F46-002 and F46-004 filters and 1000ns for  
843 the F46-006 filter were applied. The images were processed with the Image J software  
844 (NIH) ([imagej.nih.gov/ij/](http://imagej.nih.gov/ij/)) to generate scale-bar inserted RGB merged TIFF files for  
845 further analysis with Imaris MeasurementPro software. Images in Figure 1 and  
846 Supplementary 1 were adjusted for brightness and contrast in Image J, where needed,  
847 calculated, and stamped with a suitable sized scale bar.

848

### 849 **Colocalization analysis for conventional epifluorescence images**

850 Merged multi-channel 40X light microscopy images were analyzed using MetaMorph  
851 Offline Version 7.7.0.0 (Molecular Devices, Inc.). A threshold is set for each channel  
852 followed by the generation of a mask for all channels, in three areas of size 25 pixels  
853 long (representing 2  $\mu$ m in the sample) and 4 pixels wide, per image. These area  
854 masks were then overlaid in the arithmetic tool and divided to generate a third mask

855 containing only the population of fluorescence signals in the mask that do colocalize.  
856 The amount of bassoon colocalized is represented as a percentage of the bassoon  
857 colocalized population divided by the total bassoon population.  
858

### 859 **STED microscopy**

860 STED images in Figures 2—6 were acquired on a custom-built two-color STED  
861 microscope that includes a 1.4 NA 100× objective (PL APO HCX 100x 1.4-0.7 Oil,  
862 Leica Microsystems, Wetzlar), and a 775nm STED laser (ELP-5-775-DG, IPG  
863 Photonics Corporation, Oxford, MA, USA)<sup>4</sup>. The dyes were excited at wavelengths of  
864 470nm, 595nm, and 640nm, while the fluorescence was detected with avalanche  
865 photodiodes from 500-550nm, 600-640nm, and 660-720nm, respectively.  
866 Corroborative confocal images were acquired using a LED illumination source, a  
867 monochrome filter, and a camera (DMK41 AU02, The Imaging Source). The LED  
868 illumination source for such overview images was manually installed every session,  
869 wherein a 590nm LED was installed with the 700/60 fluorescence filter, and 640RDC  
870 dichroic filter or a 490nm LED was installed (upon requirement) with the 450/60  
871 fluorescence filter in the camera path. Images were taken at 300—700 mW STED  
872 power, 4μW excitation power, dwell time of 30—100ms and a pixel size of 10nm. The  
873 resolution regularly obtained for Atto594 antibodies was 25-40nm and for AttoKK1212  
874 antibodies was 20-35nm (at 300mW and 700 mW STED-power, respectively). Figures  
875 2-6 were acquired on the Abberior QuadSCAN two-color STED microscope. The setup  
876 was equipped with a pulsed 775nm STED laser and two pulsed excitation laser-  
877 sources at 594nm and 640nm integrated into an Olympus IX83 microscope. The setup  
878 also included a 100× 1.4NA objective; a 4-color LED illumination source, a gated  
879 avalanche photodiode (APD), and a wide monochrome field. A pixel size of 10 nm,  
880 dwell time of 3ms, and three-line accumulations were applied to the images. All STED  
881 images were acquired with the ImSpector Software<sup>5</sup> (Max Planck Innovation) and were  
882 processed using the Richardson—Lucy deconvolution function. In combination with  
883 the deconvolution processing, a 2D Lorentz function, that fits the full width at half  
884 maximum (FWHM) fitted of the point spread function of each individual image to the  
885 resolution estimate was used. These images were then analyzed using Imaris  
886 MeasurementPro. Images for figures were adjusted for brightness and contrast with  
887 Image J software (NIH).  
888

### 889 **Quantitative analysis of the probability and amount of colocalization and the 890 distribution of Bassoon constructs at the Golgi**

891 Merged TIFF epifluorescence images or STED images were analyzed using Imaris  
892 MeasurementPro 8.1(Bitplane AG.) software to ascertain the probability of  
893 colocalization (Pearson's correlation coefficient), amount of colocalization, and  
894 distribution pattern of signals within the images.

895 Soma Images in Figures 3—6 were analyzed within a ROI, generated by a free-hand  
896 drawn mask, to exclude any signals in the image that was in the nucleus, outside the  
897 cell soma, or in a neighboring neuronal process. Images were analyzed for the  
898 probability of colocalization through the ImarisColoc module. The integrated Costes P-  
899 Value approximation plugin<sup>7</sup>, within the ImarisColoc module, first generates automated  
900 thresholds for all the channels of all the images, which are subsequently used to  
901 calculate the colocalization Pearson's correlation coefficient constants in the picture.

902 The amount of colocalization and distribution pattern of signals was calculated after  
903 Imaris Spots generation. Imaris Spots, a built-in spot detection algorithm, was used to  
904 generate objects for every punctuate signal, for all channels, in the images. These spot  
905 objects were defined by the automated intensity threshold value for each channel



906 (calculated by the Costes P-Value approximation), signal diameter size range (10nm—  
907 160nm for STED images and >200nm for light microscopy images), and an automated  
908 splitting of signal clusters (defined as >120nm for STED images and >400nm for light  
909 microscopy images), for each channel.

910 The amount of colocalization was calculated using Spots Colocalize, a MATLAB  
911 extension in the Imaris Spots module, at a distance threshold of 0—100nm (for STED  
912 images) and 0—350nm (for light microscopy images) from the spot centers.

913 The distribution pattern of AZ protein signals at the Golgi was extracted by applying  
914 the distance transformation MATLAB extension<sup>8</sup>, from the Imaris XT module to the  
915 spots object information generated via the Imaris Spots module. This distance  
916 transformation extension was applied on the Golgi label channel transforming the Golgi  
917 voxel intensity data into spot coordinates. These spot coordinates were then used to  
918 calculate the shortest distance of each AZ protein spot object to the object border of a  
919 Golgi-label spot. The data for the shortest distances between all the AZ protein signals  
920 and the border coordinates of the Golgi-label, and the total number of AZP signals  
921 within 0—100nm or 101—1000nm distance ranges was extracted from the statistics of  
922 the Imaris Spot module, statistically tested, and graphically represented with GraphPad  
923 Prism.

924 The distribution pattern of Bassoon constructs in Figure 7A was generated in Python  
925 and graphically visualized as violin plots, with a signal size upper limit of 600nm; to  
926 clearly represent the distribution and permit visualization of the median and  
927 interquartile ranges of the data. The average distance of each cell per set, in Figure  
928 7B, was extracted from the Imaris Spots statistics and limited to the 220nm cut-off were  
929 plotted in GraphPad Prism.

930 Statistical analysis and representation of all resultant data were prepared in GraphPad  
931 Prism 5.02. Data are presented as mean  $\pm$  SEM, and statistical differences were  
932 considered significant, strongly significant, and extremely significant at respective p  
933 values of \*p < 0.05, \*\*p  $\leq$  0.01, and \*\*\*p  $\leq$  0.001. In a two-step statistical testing  
934 protocol, first, a one-way ANOVA test, with a post-hoc Tukey's multiple comparisons  
935 test, was performed, and for every significant difference observed between two  
936 relevant groups, an additional two-tailed, unpaired Student's t-test, with different  
937 variances, was also performed to reveal the same significant difference.

938

### 939 **Quantitative analysis of distances between Bassoon's termini and the post** 940 **synapse**

941 All acquired, or rendered images were processed and visualized using ImageJ  
942 ([imagej.nih.gov/ij/](http://imagej.nih.gov/ij/)) and ImSpector software (Max-Planck Innovation) (Figure 2) or  
943 Daxviewer software (Mark Bates) (Figure 3). Line profiles were measured with ImageJ  
944 software along a 350nm thick line profiles. Inter-peak Bassoon-SHANK2 distances  
945 were determined after fitting a Gaussian distribution in GraphPad Prism.

946 To factor out the effect of the varying number of signals counted per size of hand-  
947 drawn mask in each image, the area in  $\mu\text{m}^3$  of the mask used, was divided by the  
948 signals measured per image.

949

### 950 **Acknowledgements**

951

952 We are thankful to Prof. Stefan W. Hell, Dr. Dirk Kamin and Dr. Fabian Göttfert for the  
953 training and guidance on the STED setups a Max Plank institute of Biophysical  
954 Chemistry. We thank Irmgard Weiss for technical assistance. This work was supported  
955 by the DFG Research Center for Nanoscale Microscopy and Molecular Physiology of  
956 the Brain (CNMPB) to TD.

957 **References**

- 958
- 959 Acuna, C., Liu, X., and Südhof, T.C. (2016). How to Make an Active Zone: Unexpected  
960 Universal Functional Redundancy between RIMs and RIM-BPs. *Neuron* 91, 792–807.
- 961 Bresler, T., Shapira, M., Boeckers, T., Dresbach, T., Futter, M., Garner, C.C.,  
962 Rosenblum, K., Gundelfinger, E.D., and Ziv, N.E. (2004). Postsynaptic density  
963 assembly is fundamentally different from presynaptic active zone assembly. *J Neurosci*  
964 24, 1507–1520.
- 965 Bury, L.A.D., and Sabo, S.L. (2011). Coordinated trafficking of synaptic vesicle and  
966 active zone proteins prior to synapse formation. *Neural Dev* 6, 24.
- 967 Bury, L.A.D., and Sabo, S.L. (2016). Building a Terminal: Mechanisms of Presynaptic  
968 Development in the CNS. *Neuroscientist* 22, 372–391.
- 969 Cai, Q., Pan, P.-Y., and Sheng, Z.-H. (2007). Syntabulin-kinesin-1 family member 5B-  
970 mediated axonal transport contributes to activity-dependent presynaptic assembly. *J*  
971 *Neurosci* 27, 7284–7296.
- 972 Cases-Langhoff, C., Voss, B., Garner, A.M., Appeltauer, U., Takei, K., Kindler, S., Veh,  
973 R.W., De Camilli, P., Gundelfinger, E.D., and Garner, C.C. (1996). Piccolo, a novel  
974 420 kDa protein associated with the presynaptic cytomatrix. *Eur J Cell Biol* 69, 214–  
975 223.
- 976 Dani, A., Huang, B., Bergan, J., Dulac, C., and Zhuang, X. (2010). Superresolution  
977 imaging of chemical synapses in the brain. *Neuron* 68, 843–856.
- 978 Davydova, D., Marini, C., King, C., Klueva, J., Bischof, F., Romorini, S., Montenegro-  
979 Venegas, C., Heine, M., Schneider, R., Schröder, M.S., et al. (2014). Bassoon  
980 specifically controls presynaptic P/Q-type Ca(2+) channels via RIM-binding protein.  
981 *Neuron* 82, 181–194.
- 982 tom Dieck, S., Sanmartí-Vila, L., Langnaese, K., Richter, K., Kindler, S., Soyke, A.,  
983 Wex, H., Smalla, K.H., Kämpf, U., Fränzer, J.T., et al. (1998). Bassoon, a novel zinc-  
984 finger CAG/glutamine-repeat protein selectively localized at the active zone of  
985 presynaptic nerve terminals. *J Cell Biol* 142, 499–509.
- 986 Dresbach, T., Qualmann, B., Kessels, M.M., Garner, C.C., and Gundelfinger, E.D.  
987 (2001). The presynaptic cytomatrix of brain synapses. *Cell Mol Life Sci* 58, 94–116.
- 988 Dresbach, T., Hempelmann, A., Spilker, C., tom Dieck, S., Altmann, W.D., Zuschratter,  
989 W., Garner, C.C., and Gundelfinger, E.D. (2003). Functional regions of the presynaptic  
990 cytomatrix protein bassoon: significance for synaptic targeting and cytomatrix  
991 anchoring. *Mol Cell Neurosci* 23, 279–291.
- 992 Dresbach, T., Torres, V., Wittenmayer, N., Altmann, W.D., Zamorano, P., Zuschratter,  
993 W., Nawrotzki, R., Ziv, N.E., Garner, C.C., and Gundelfinger, E.D. (2006). Assembly  
994 of active zone precursor vesicles: obligatory trafficking of presynaptic cytomatrix  
995 proteins Bassoon and Piccolo via a trans-Golgi compartment. *J Biol Chem* 281, 6038–  
996 6047.

- 997 Fejtova, A., and Gundelfinger, E.D. (2006). Molecular organization and assembly of  
998 the presynaptic active zone of neurotransmitter release. *Results Probl Cell Differ* 43,  
999 49–68.
- 1000 Fenster, S.D., Chung, W.J., Zhai, R., Cases-Langhoff, C., Voss, B., Garner, A.M.,  
1001 Kaempfer, U., Kindler, S., Gundelfinger, E.D., and Garner, C.C. (2000). Piccolo, a  
1002 presynaptic zinc finger protein structurally related to bassoon. *Neuron* 25, 203–214.
- 1003 Garner, C.C., Kindler, S., and Gundelfinger, E.D. (2000). Molecular determinants of  
1004 presynaptic active zones. *Curr Opin Neurobiol* 10, 321–327.
- 1005 Good, M.C., Zalatan, J.G., and Lim, W.A. (2011). Scaffold proteins: hubs for controlling  
1006 the flow of cellular information. *Science* 332, 680–686.
- 1007 Griffiths, G., and Simons, K. (1986). The trans golgi network: sorting at the exit site of  
1008 the golgi complex. *Science* 234, 438–443.
- 1009 Gundelfinger, E.D., Reissner, C., and Garner, C.C. (2015). Role of Bassoon and  
1010 Piccolo in Assembly and Molecular Organization of the Active Zone. *Front Synaptic*  
1011 *Neurosci* 7, 19.
- 1012 Hallermann, S., Fejtova, A., Schmidt, H., Weyhersmüller, A., Silver, R.A.,  
1013 Gundelfinger, E.D., and Eilers, J. (2010). Bassoon speeds vesicle reloading at a  
1014 central excitatory synapse. *Neuron* 68, 710–723.
- 1015 Hamers-Casterman, C., Atarhouch, T., Muyldermans, S., Robinson, G., Hamers, C.,  
1016 Songa, E.B., Bendahman, N., and Hamers, R. (1993). Naturally occurring antibodies  
1017 devoid of light chains. *Nature* 363, 446–448.
- 1018 Held, R.G., Liu, C., Ma, K., Ramsey, A.M., Tarr, T.B., De Nola, G., Wang, S.S.H.,  
1019 Wang, J., van den Maagdenberg, A.M.J.M., Schneider, T., et al. (2020). Synapse and  
1020 Active Zone Assembly in the Absence of Presynaptic Ca<sup>2+</sup> Channels and Ca<sup>2+</sup> Entry.  
1021 *Neuron* 107, 667-683.e9.
- 1022 Hoffmann-Conaway et al., S., Brockmann, M.M., Schneider, K., Annamneedi, A.,  
1023 Rahman, K.A., Bruns, C., Textori-Taube, K., Trimbuch, T., Smalla, K.-H., Rosenmund,  
1024 C., Gundelfinger, E.D., Garner, C.C., and Montenegro-Venegas, C. (2020). Parkin  
1025 contributes to synaptic vesicle autophagy in Bassoon-deficient mice. *Elife* 9: e56590  
1026
- 1027 Imig, C., Min, S.-W., Krinner, S., Arancillo, M., Rosenmund, C., Südhof, T.C., Rhee, J.,  
1028 Brose, N., and Cooper, B.H. (2014). The morphological and molecular nature of  
1029 synaptic vesicle priming at presynaptic active zones. *Neuron* 84, 416–431.
- 1030 Lee, S.-H., Peng, I.-F., Ng, Y.G., Yanagisawa, M., Bamji, S.X., Elia, L.P., Balsamo, J.,  
1031 Lilien, J., Anastasiadis, P.Z., Ullian, E.M., et al. (2008). Synapses are regulated by the  
1032 cytoplasmic tyrosine kinase Fer in a pathway mediated by p120catenin, Fer, SHP-2,  
1033 and beta-catenin. *J Cell Biol* 183, 893–908.
- 1034 Limbach, C., Laue, M.M., Wang, X., Hu, B., Thiede, N., Hultqvist, G., and Kilimann,  
1035 M.W. (2011). Molecular in situ topology of Aczonin/Piccolo and associated proteins at  
1036 the mammalian neurotransmitter release site. *Proc Natl Acad Sci U S A* 108, E392-  
1037 401.

- 1038 Maas, C., Torres, V.I., Altrock, W.D., Leal-Ortiz, S., Wagh, D., Terry-Lorenzo, R.T.,  
1039 Fejtova, A., Gundelfinger, E.D., Ziv, N.E., and Garner, C.C. (2012). Formation of Golgi-  
1040 derived active zone precursor vesicles. *J Neurosci* 32, 11095–11108.
- 1041 Matz, J., Gilyan, A., Kolar, A., McCarvill, T., and Krueger, S.R. (2010). Rapid structural  
1042 alterations of the active zone lead to sustained changes in neurotransmitter release.  
1043 *Proc Natl Acad Sci U S A* 107, 8836–8841.
- 1044 Mellman, I., and Simons, K. (1992). The golgi complex: in vitro veritas. *Cell* 68, 829–  
1045 840.
- 1046 Mendoza Schulz, A., Jing, Z., Sánchez Caro, J.M., Wetzel, F., Dresbach, T., Strenzke,  
1047 N., Wichmann, C., and Moser, T. (2014). Bassoon-disruption slows vesicle  
1048 replenishment and induces homeostatic plasticity at a CNS synapse. *EMBO J* 33, 512–  
1049 527.
- 1050 Montenegro-Venegas, C., Fienko, S., Anni, D., Pina-Fernandez, E., Frischknecht, R.,  
1051 and Fejtova, A. (2021). Bassoon inhibits proteasome activity via interaction with  
1052 PSMB4. *Cell Mol Life Sci* 78: 1545-1563.
- 1053 Okerlund, N.D., Schneider, K., Leal-Ortiz, S., Montenegro-Venegas, C., Kim, S.A.,  
1054 Garner, L.C., Waites, C.L., Gundelfinger, E.D., Reimer, R.J., and Garner, C.C. (2017).  
1055 Bassoon Controls Presynaptic Autophagy through Atg5. *Neuron* 93, 897-913.e7.
- 1056 Phillips, G.R., Huang, J.K., Wang, Y., Tanaka, H., Shapiro, L., Zhang, W., Shan, W.S.,  
1057 Arndt, K., Frank, M., Gordon, R.E., et al. (2001). The presynaptic particle web:  
1058 ultrastructure, composition, dissolution, and reconstitution. *Neuron* 32, 63–77.
- 1059 Sanmartí-Vila, L., tom Dieck, S., Richter, K., Altrock, W., Zhang, L., Volkand, W.,  
1060 Zimmermann, H., Garner, C.C., Gundelfinger, E.D., and Dresbach, T. (2000).  
1061 Membrane association of presynaptic cytomatrix protein bassoon. *Biochem Biophys*  
1062 *Res Commun* 275, 43–46.
- 1063 Schoch, S., and Gundelfinger, E.D. (2006). Molecular organization of the presynaptic  
1064 active zone. *Cell Tissue Res* 326, 379–391.
- 1065 Shapira, M., Zhai, R.G., Dresbach, T., Bresler, T., Torres, V.I., Gundelfinger, E.D., Ziv,  
1066 N.E., and Garner, C.C. (2003). Unitary assembly of presynaptic active zones from  
1067 Piccolo-Bassoon transport vesicles. *Neuron* 38, 237–252.
- 1068 Südhof, T.C. (2012). The presynaptic active zone. *Neuron* 75, 11–25.
- 1069 Tao-Cheng, J.-H. (2007). Ultrastructural localization of active zone and synaptic  
1070 vesicle proteins in a preassembled multi-vesicle transport aggregate. *Neuroscience*  
1071 150, 575–584.
- 1072 Tsuruel, S., Geva, R., Zamorano, P., Dresbach, T., Boeckers, T., Gundelfinger, E.D.,  
1073 Garner, C.C., and Ziv, N.E. (2006). Local sharing as a predominant determinant of  
1074 synaptic matrix molecular dynamics. *PLoS Biol* 4, e271.
- 1075 Tsuruel, S., Fisher, A., Wittenmayer, N., Dresbach, T., Garner, C.C., and Ziv, N.E.  
1076 (2009). Exchange and redistribution dynamics of the cytoskeleton of the active zone  
1077 molecule bassoon. *J Neurosci* 29, 351–358.

- 1078 Vukoja, A., Rey, U., Petzoldt, A.G., Ott, C., Vollweiter, D., Quentin, C., Puchkov, D.,  
1079 Reynolds, E., Lehmann, M., Hohensee, S., et al. (2018). Presynaptic Biogenesis  
1080 Requires Axonal Transport of Lysosome-Related Vesicles. *Neuron* 99, 1216-1232.e7.
- 1081 Waites, C.L., Leal-Ortiz, S.A., Okerlund, N., Dalke, H., Fejtova, A., Altmann, W.D.,  
1082 Gundelfinger, E.D., and Garner, C.C. (2013). Bassoon and Piccolo maintain synapse  
1083 integrity by regulating protein ubiquitination and degradation. *EMBO J* 32, 954–969.
- 1084 Wang, X., Kibschull, M., Laue, M.M., Lichte, B., Petrasch-Parwez, E., and Kilimann,  
1085 M.W. (1999). Aczonin, a 550-kD putative scaffolding protein of presynaptic active  
1086 zones, shares homology regions with Rim and Bassoon and binds profilin. *J Cell Biol*  
1087 147, 151–162.
- 1088 Wildanger, D., Medda, R., Kastrup, L., and Hell, S.W. (2009a). A compact STED  
1089 microscope providing 3D nanoscale resolution. *J Microsc* 236, 35–43.
- 1090 Wildanger, D., Bückers, J., Westphal, V., Hell, S.W., and Kastrup, L. (2009b). A STED  
1091 microscope aligned by design. *Opt Express* 17, 16100–16110.
- 1092 Wittenmayer, N. (2014). Photoconversion of CFP to study neuronal tissue with electron  
1093 microscopy. *Methods Mol Biol* 1148, 77–87.
- 1094 Zhai, R.G., Vardinon-Friedman, H., Cases-Langhoff, C., Becker, B., Gundelfinger,  
1095 E.D., Ziv, N.E., and Garner, C.C. (2001). Assembling the presynaptic active zone: a  
1096 characterization of an active one precursor vesicle. *Neuron* 29, 131–143.
- 1097
